# Supplementary material for: Unravelling the Structure of the Tetrahedral Metal-Binding Site in METP3 through an Experimental and Computational Approach
Source: MDPI journal article supplement (doi:10.3390/molecules26175221), 2021-08-28
Supplement: s1 [file s1]

## **Supplementary Information**

### **Unravelling the structure of tetrahedral metal binding sites through an experimental and computational approach**

Salvatore La Gatta <sup>1,†</sup>, Linda Leone <sup>1,†</sup>, Ornella Maglio <sup>1,2</sup>, Maria De Fenza <sup>1</sup>, Flavia Nastri <sup>1</sup>, Vincenzo Pavone <sup>1</sup>, Marco Chino <sup>1,\*</sup> and Angela Lombardi <sup>1,\*</sup>

<sup>1</sup> Department of Chemical Sciences, University of Napoli Federico II,  
Via Cintia, 80126 Napoli, Italy

<sup>2</sup> Istituto di Biostrutture e Bioimmagini (IBB), National Research Council (CNR),  
Via Mezzocannone 16, 80134 Napoli, Italy

\* Corresponding authors

† These authors contributed equally to this work.

## SUPPLEMENTARY FIGURES

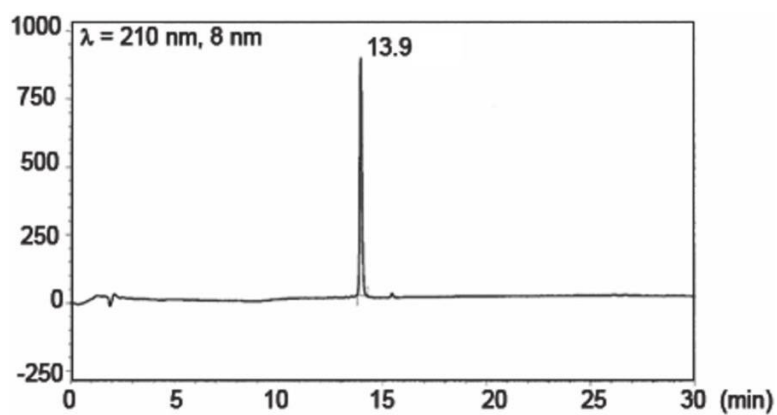

**Figure S1.** RP-HPLC chromatogram at  $\lambda = 210 \text{ nm}$  of pure METP3.

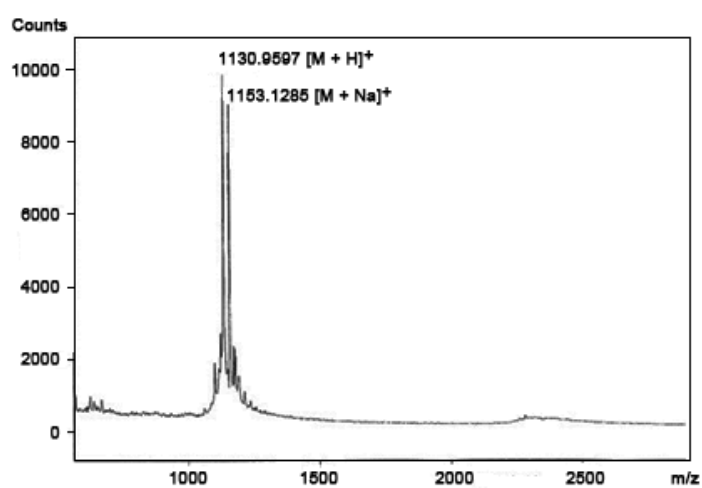

**Figure S2.** MALDI-TOF spectrum of pure METP3.

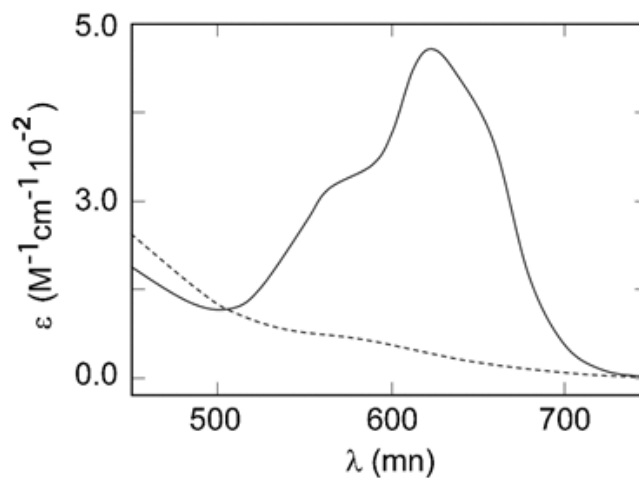

**Figure S3.** Visible spectra of Co(II)-METP3 complex in the absence (dotted line) and in the presence (solid line) of 10% excess of Zn(II), pH= 8.2.

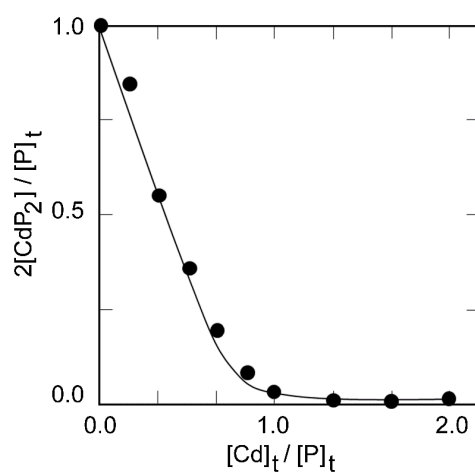

**Figure S4.** Spectrophotometric competition experiment of Co(II)-METP3 complex with Cd(II). The saturation fraction  $2[\text{CdP}_2]/[\text{P}]_t$  is plotted against the concentration ratio  $[\text{Cd}]_t/[\text{P}]_t$ . Solid line shows the best fit of data points to equation (3) reported in the main text.

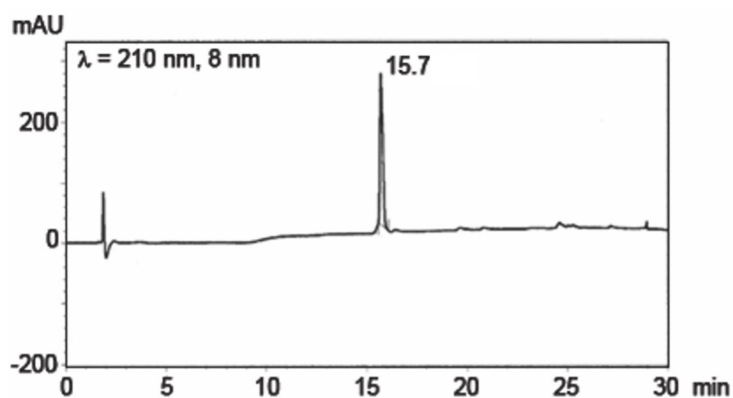

**Figure S5.** RP-HPLC chromatogram at  $\lambda = 210$  nm of inter-molecularly oxidized METP3.

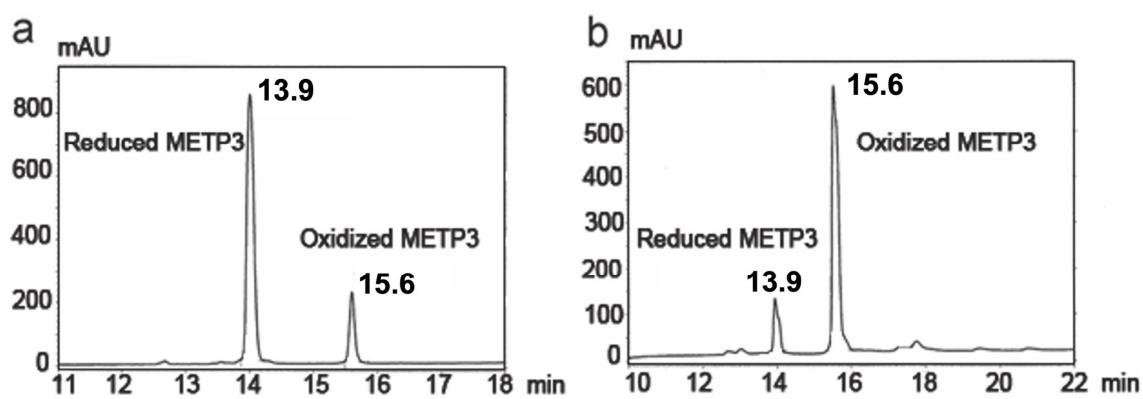

**Figure S6.** RP-HPLC chromatograms at  $\lambda = 210$  nm of METP3 metal complexes. (a) Zn(II)-METP3 complex 4 days after the preparation; (b) Co(II)-METP3 complex 2 hours after the preparation.

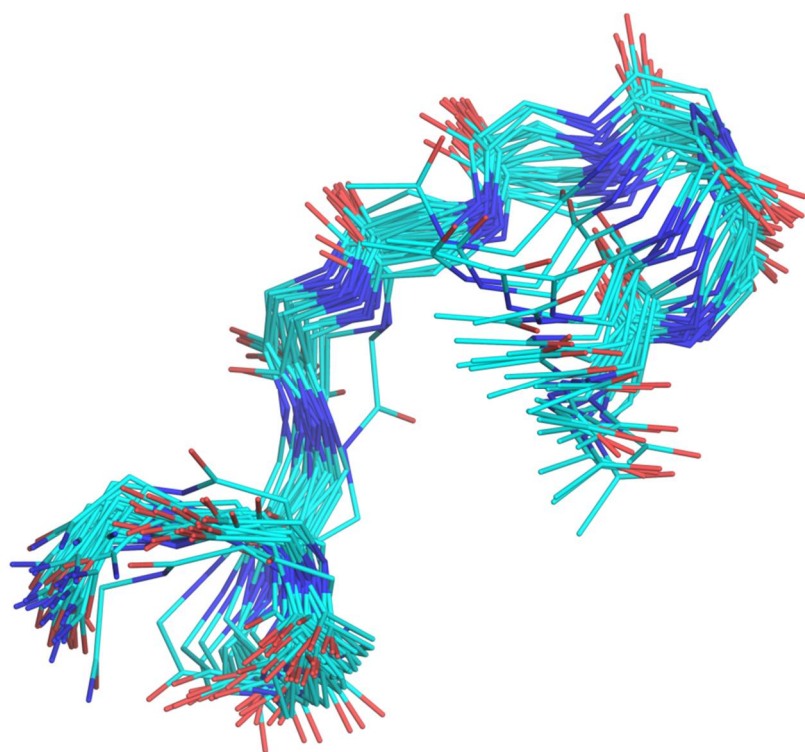

**Figure S7.** Monomeric peptide chain of Zn(II)-METP3 complex: backbone atom superposition of an ensemble of 30 representative NMR conformers along the RMD trajectory.

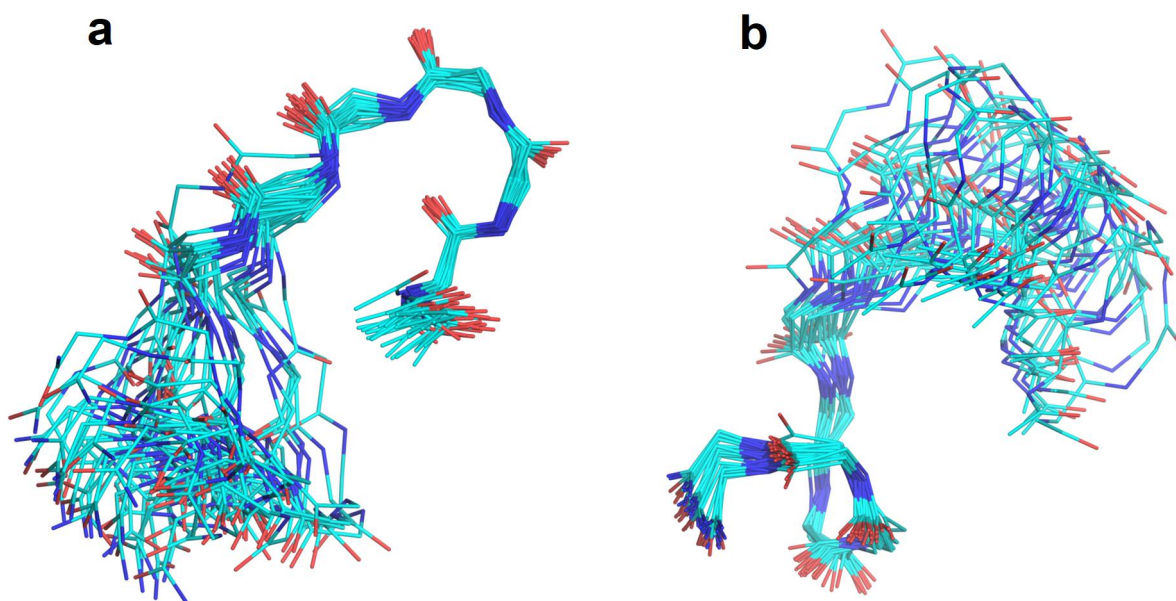

**Figure S8.** Monomeric peptide chain of Zn(II)-METP3 complex: backbone atom superposition of the N-terminal (a) and C-terminal (b) segments in the ensemble of 30 representative NMR conformers along the RMD trajectory.

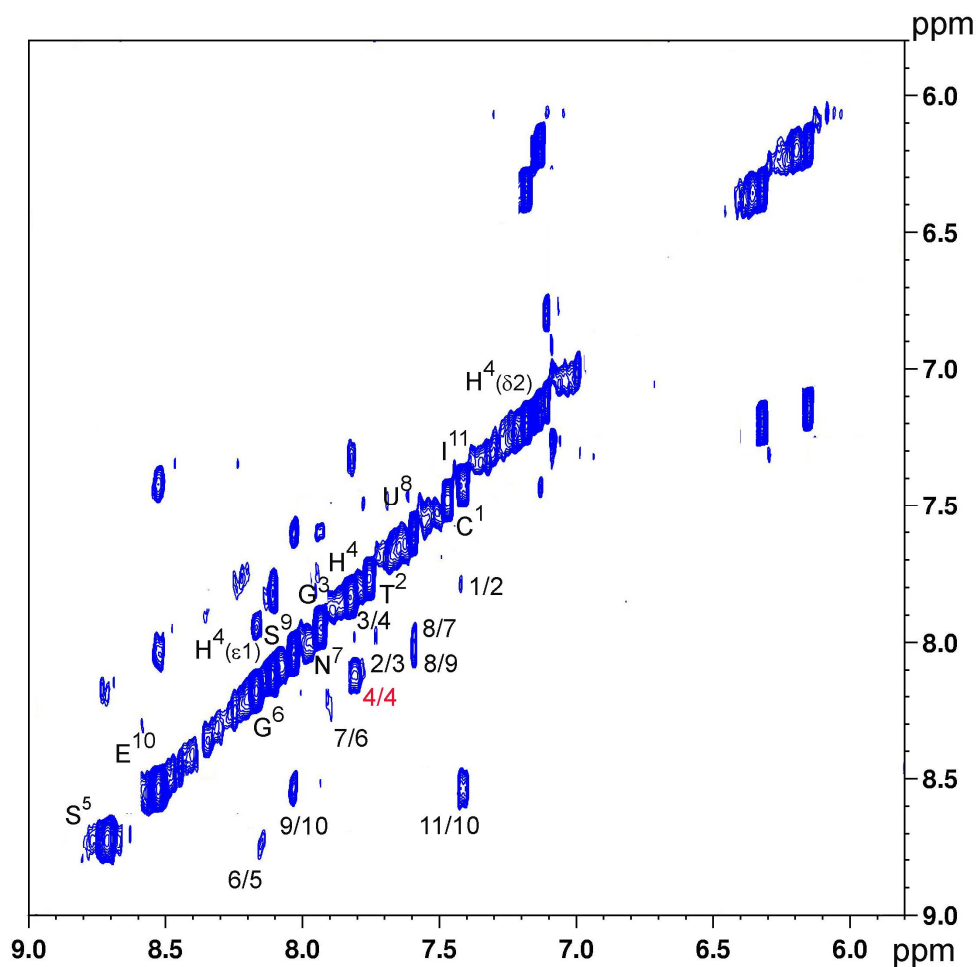

**Figure S9.** NOESY contour plot of the amide proton region of Zn(II)-METP3 complex (mixing time 300 ms). NH-NH connectivities are labeled. The intermonomer correlation involving the  $\epsilon^1$  and amide protons of His<sup>4(4')</sup> is labeled in red.

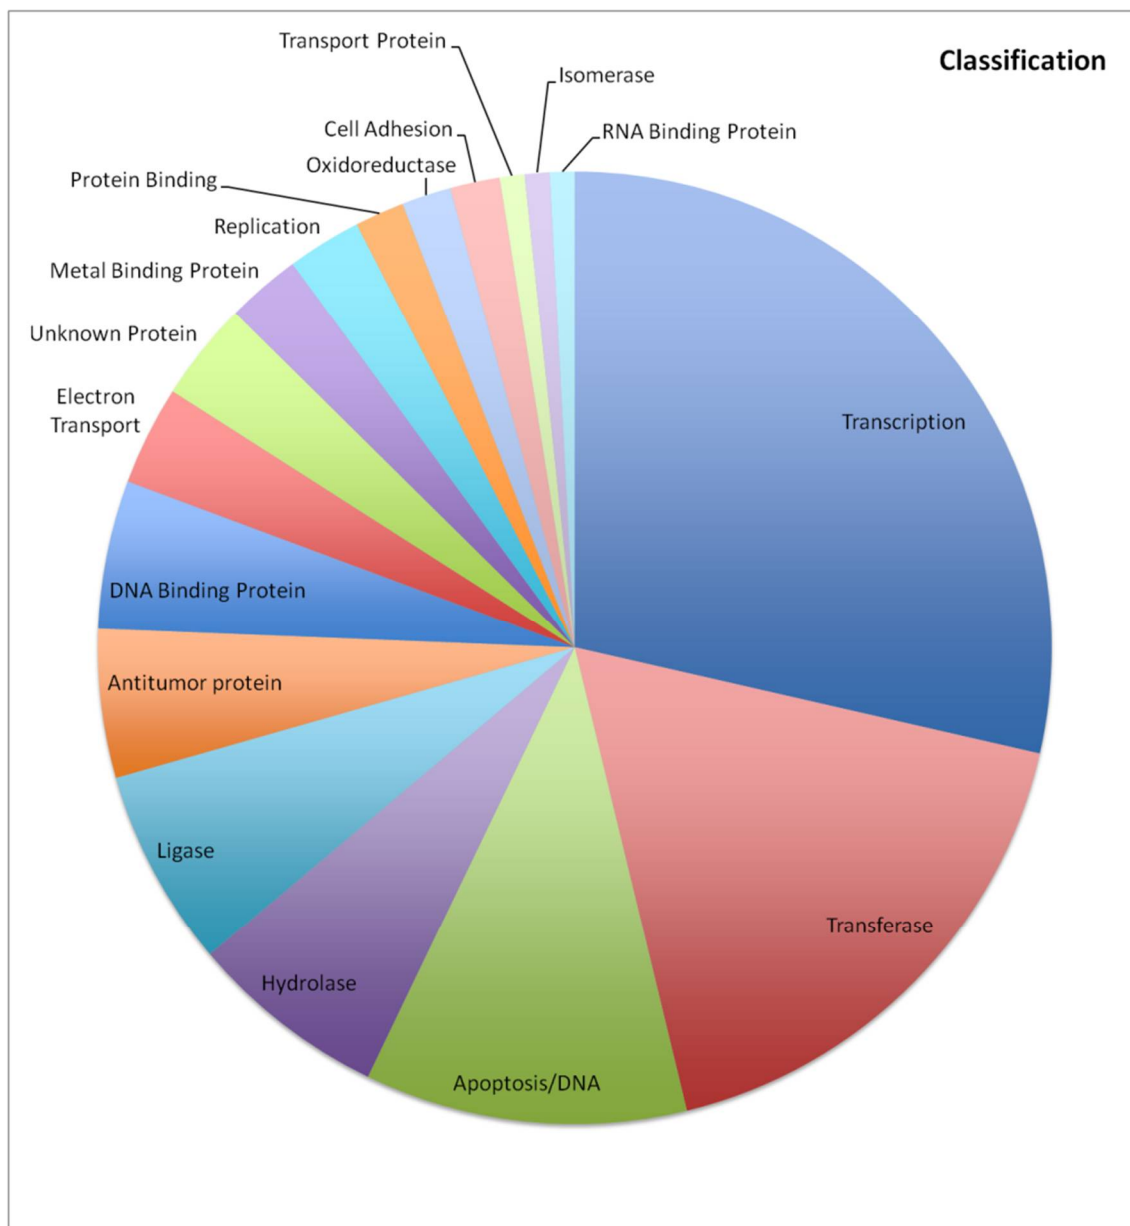

**Figure S10.** Pie chart showing the functions of proteins making up the C-X<sub>1</sub>-X<sub>2</sub>-H-X<sub>3</sub> structural database.

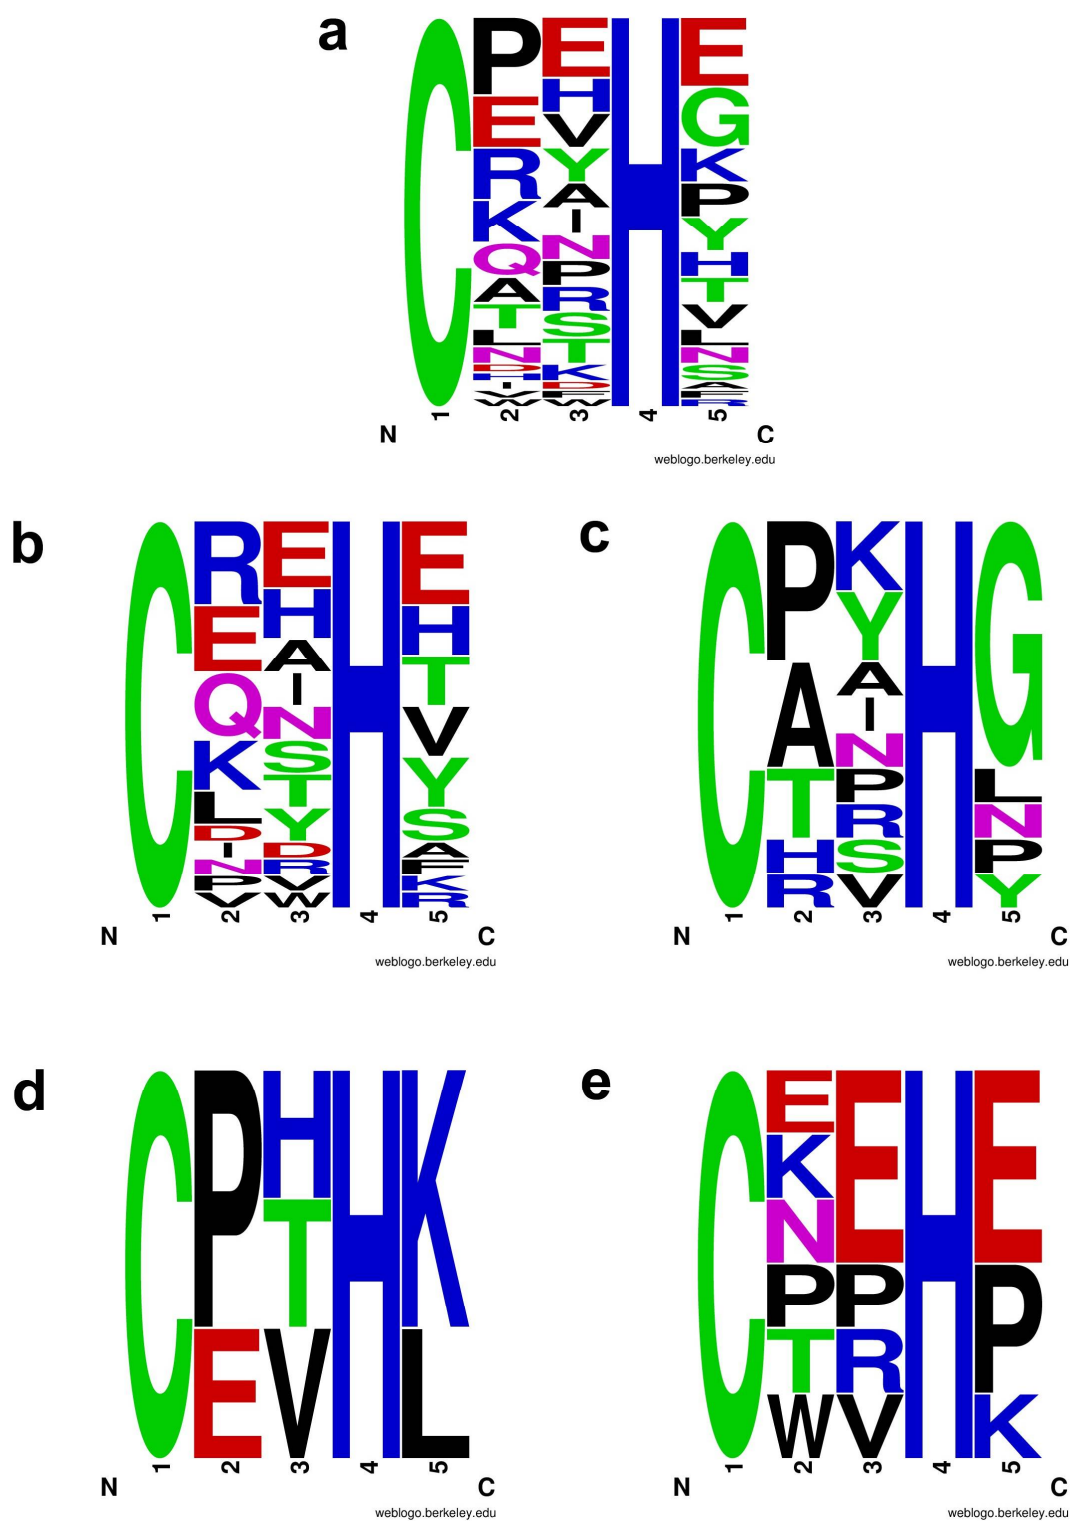

**Figure S11.** Web logo analysis of the C-X<sub>1</sub>-X<sub>2</sub>-H-X<sub>3</sub> motifs for: (a) the full dataset; (b) cluster 1; (c) Cluster 2; (d) Cluster 3; (e) Cluster 4.



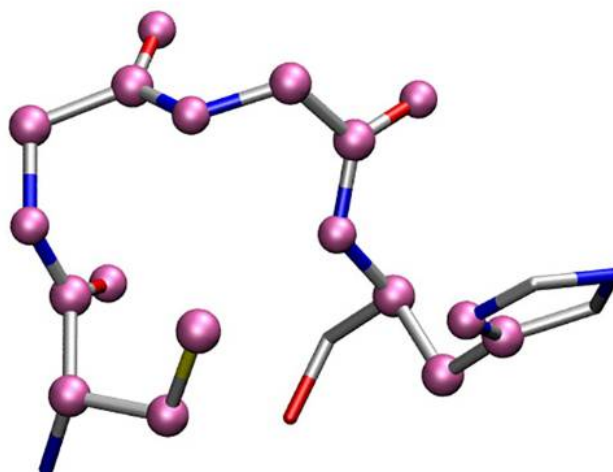

**Figure S12.** Atom set used to superimpose the structures. The atoms included in the data set are highlighted by pink spheres.

## SUPPLEMENTARY TABLES

**Table S1.** Proton Chemical Shifts,  $^3J$  Coupling Constants and Temperature Coefficients of Zn(II)-METP3 in TFE, at 298 K.<sup>a</sup>

| Residue           | NH   | C $\alpha$ H | C $\beta$ H                                 | C $\gamma$ H                                                          | C $\delta$ H | others                                | $^3J_{\text{NH-}\alpha\text{CH}}$<br>(Hz) | $-\Delta\delta_{\text{NH}}/\Delta T$<br>(ppb/K) |
|-------------------|------|--------------|---------------------------------------------|-----------------------------------------------------------------------|--------------|---------------------------------------|-------------------------------------------|-------------------------------------------------|
| Acetyl            |      |              |                                             |                                                                       |              | 2.07                                  |                                           |                                                 |
| Cys <sup>1</sup>  | 7.46 | 4.58         | 2.95-2.85                                   |                                                                       |              |                                       | 6.9                                       | 6.0                                             |
| Thr <sup>2</sup>  | 7.75 | 4.33         | 4.33                                        | 1.25                                                                  |              |                                       | 6.6                                       | 4.3                                             |
| Gly <sup>3</sup>  | 7.93 | 3.99-3.78    |                                             |                                                                       |              |                                       | 6.5                                       | 2.5                                             |
| His <sup>4</sup>  | 7.82 | 4.78         | 3.32-3.10                                   |                                                                       |              | 8.10( $\epsilon$ 1)-7.10( $\delta$ 2) | 7.0                                       | 7.1                                             |
| Ser <sup>5</sup>  | 8.70 | 4.41         | 4.02-3.94                                   |                                                                       |              |                                       | 6.8                                       | 10.0                                            |
| Gly <sup>6</sup>  | 8.16 | 4.03-3.90    |                                             |                                                                       |              |                                       | 8.2                                       | 4.3                                             |
| Asn <sup>7</sup>  | 7.94 | 4.68         | 2.83                                        |                                                                       |              | 7.18-6.31( $\gamma$ NH <sub>2</sub> ) | 7.7                                       | 4.2                                             |
| Aib <sup>8</sup>  | 7.60 |              | 1.53 <sup>proR</sup> , 1.50 <sup>proS</sup> |                                                                       |              |                                       | -                                         | 4.1                                             |
| Ser <sup>9</sup>  | 8.03 | 4.17         | 3.99-3.90                                   |                                                                       |              |                                       | 4.2                                       | 5.1                                             |
| Glu <sup>10</sup> | 8.52 | 4.20         | 2.16                                        | 2.45                                                                  |              |                                       | 7.8                                       | 5.3                                             |
| Ile <sup>11</sup> | 7.42 | 4.21         | 1.98                                        | C $\gamma$ H <sub>2</sub> 1.54-1.25<br>C $\gamma$ H <sub>3</sub> 0.96 | 0.88         |                                       | 8.3                                       | 2.1                                             |
| NH <sub>2</sub>   |      |              |                                             |                                                                       |              | 7.13-6.15                             |                                           | 3.8, 3.2                                        |

<sup>a</sup>Chemical shifts were referenced to the internal TSP.

**Table S2.** Protein structures containing the -C-X<sub>1</sub>-X<sub>2</sub>-H-X<sub>3</sub> motif (X<sub>1</sub>, X<sub>2</sub>, X<sub>3</sub>= any amino acid). The corresponding sequences are indicated as single Letter Codes. Protein function is also indicated.

| PDB code <sup>a</sup> | Macromolecular Name                                                   | Title                                                                                                                           | Classification    | Resolution (Å) | -C-X <sub>1</sub> -X <sub>2</sub> -H-X <sub>3</sub> -motif | Reference                                          |
|-----------------------|-----------------------------------------------------------------------|---------------------------------------------------------------------------------------------------------------------------------|-------------------|----------------|------------------------------------------------------------|----------------------------------------------------|
| 1T4W_A                | C.Elegans p53 tumor suppressor-like transcription factor              | Structural Differences in the DNA Binding Domains of Human p53 and its C. elegans Ortholog Cep-1: Structure of C. elegans Cep-1 | Transcription     | 2.10           | -. <sup>307</sup> C-R-S-H-T <sup>311</sup> -.              | Huyen Y. <i>et al.</i> Structure 2004, 12, 1237    |
| 1TSR_A                | P53 tumor suppressor                                                  | P53 core domain in complex with DNA                                                                                             | Transcription     | 2.20           | -. <sup>176</sup> C-P-H-H-E <sup>180</sup> -.              | Cho Y. <i>et al.</i> Science 1994, 265, 346        |
| 1TSR_B                | P53 tumor suppressor                                                  | P53 core domain in complex with DNA                                                                                             | Transcription     | 2.20           | -. <sup>176</sup> C-P-H-H-E <sup>180</sup> -.              | Cho Y. <i>et al.</i> Science 1994, 265, 346        |
| 1TSR_C                | P53 tumor suppressor                                                  | P53 core domain in complex with DNA                                                                                             | Transcription     | 2.20           | -. <sup>176</sup> C-P-H-H-E <sup>180</sup> -.              | Cho Y. <i>et al.</i> Science 1994, 265, 346        |
| 1TUP_A                | P53 tumor suppressor                                                  | Tumor suppressor P53 complex with DNA                                                                                           | Transcription     | 2.20           | -. <sup>176</sup> C-P-H-H-E <sup>180</sup> -.              | Cho Y. <i>et al.</i> Science 1994, 265, 346        |
| 1TUP_B                | P53 tumor suppressor                                                  | Tumor suppressor P53 complex with DNA                                                                                           | Transcription     | 2.20           | -. <sup>176</sup> C-P-H-H-E <sup>180</sup> -.              | Cho Y. <i>et al.</i> Science 1994, 265, 346        |
| 1TUP_C                | P53 tumor suppressor                                                  | Tumor suppressor P53 complex with DNA                                                                                           | Transcription     | 2.20           | -. <sup>176</sup> C-P-H-H-E <sup>180</sup> -.              | Cho Y. <i>et al.</i> Science 1994, 265, 346        |
| 1VFY_A                | Phosphatidylinoditol-3-phosphate binding FYVE domain of protein VPS27 | Phosphatidylinoditol-3-phosphate binding FYVE domain of VPS27P protein from <i>Saccharomyces Cerevisiae</i>                     | Transport Protein | 1.15           | -. <sup>200</sup> C-Q-E-H-S <sup>204</sup> -.              | Misra S. <i>et al.</i> Cell 1999, 97, 657-666.     |
| 1WUR_A                | GTP cyclohydrolase I                                                  | Structure of GTP cyclohydrolase I Complexed with 8-oxo-dGTP                                                                     | Hydrolase         | 1.82           | -. <sup>108</sup> C-E-H-H-L <sup>112</sup> -.              | Tanaka Y. <i>et al.</i> J. Biochem. 2005, 138, 263 |
| 1WUR_B                | GTP cyclohydrolase I                                                  | Structure of GTP cyclohydrolase I Complexed with 8-oxo-dGTP                                                                     | Hydrolase         | 1.82           | -. <sup>108</sup> C-E-H-H-L <sup>112</sup> -.              | Tanaka Y. <i>et al.</i> J. Biochem. 2005, 138, 263 |
| 1WUR_C                | GTP cyclohydrolase I                                                  | Structure of GTP cyclohydrolase I Complexed with 8-oxo-dGTP                                                                     | Hydrolase         | 1.82           | -. <sup>108</sup> C-E-H-H-L <sup>112</sup> -.              | Tanaka Y. <i>et al.</i> J. Biochem. 2005, 138, 263 |

|        |                            |                                                                                    |               |      |                                             |                                                         |
|--------|----------------------------|------------------------------------------------------------------------------------|---------------|------|---------------------------------------------|---------------------------------------------------------|
| 1WUR_D | GTP cyclohydrolase I       | Structure of GTP cyclohydrolase I Complexed with 8-oxo-dGTP                        | Hydrolase     | 1.82 | - <sup>108</sup> C-E-H-H-L <sup>112</sup> - | Tanaka Y. <i>et al.</i><br>J. Biochem. 2005, 138, 263   |
| 1WUR_E | GTP cyclohydrolase I       | Structure of GTP cyclohydrolase I Complexed with 8-oxo-dGTP                        | Hydrolase     | 1.82 | - <sup>108</sup> C-E-H-H-L <sup>112</sup> - | Tanaka Y. <i>et al.</i><br>J. Biochem. 2005, 138, 263   |
| 1YCS_A | P53 tumor suppressor       | P53-53BP2 Complex                                                                  | Transcription | 2.20 | - <sup>176</sup> C-P-H-H-E <sup>180</sup> - | Gorina S. <i>et al.</i><br>Science 1996, 274, 1001      |
| 2AC0_A | Cellular tumor antigen p53 | Structural Basis of DNA Recognition by p53 Tetramers (complex I)                   | Apoptosis/DNA | 1.80 | - <sup>176</sup> C-P-H-H-E <sup>180</sup> - | Kitayner M. <i>et al.</i><br>Mol. Cell 2006, 22, 741    |
| 2AC0_B | Cellular tumor antigen p53 | Structural Basis of DNA Recognition by p53 Tetramers (complex I)                   | Apoptosis/DNA | 1.80 | - <sup>176</sup> C-P-H-H-E <sup>180</sup> - | Kitayner M. <i>et al.</i><br>Mol. Cell 2006, 22, 741    |
| 2AC0_C | Cellular tumor antigen p53 | Structural Basis of DNA Recognition by p53 Tetramers (complex I)                   | Apoptosis/DNA | 1.80 | - <sup>176</sup> C-P-H-H-E <sup>180</sup> - | Kitayner M. <i>et al.</i><br>Mol. Cell 2006, 22, 741    |
| 2AC0_D | Cellular tumor antigen p53 | Structural Basis of DNA Recognition by p53 Tetramers (complex I)                   | Apoptosis/DNA | 1.80 | - <sup>176</sup> C-P-H-H-E <sup>180</sup> - | Kitayner M. <i>et al.</i><br>Mol. Cell 2006, 22, 741    |
| 2AHI_A | Cellular tumor antigen p53 | Structural Basis of DNA Recognition by p53 Tetramers (complex III)                 | Apoptosis/DNA | 1.85 | - <sup>176</sup> C-P-H-H-E <sup>180</sup> - | Kitayner M. <i>et al.</i><br>Mol. Cell 2006, 22, 741    |
| 2AHI_B | Cellular tumor antigen p53 | Structural Basis of DNA Recognition by p53 Tetramers (complex III)                 | Apoptosis/DNA | 1.85 | - <sup>176</sup> C-P-H-H-E <sup>180</sup> - | Kitayner M. <i>et al.</i><br>Mol. Cell 2006, 22, 741    |
| 2AHI_C | Cellular tumor antigen p53 | Structural Basis of DNA Recognition by p53 Tetramers (complex III)                 | Apoptosis/DNA | 1.85 | - <sup>176</sup> C-P-H-H-E <sup>180</sup> - | Kitayner M. <i>et al.</i><br>Mol. Cell 2006, 22, 741    |
| 2AHI_D | Cellular tumor antigen p53 | Structural Basis of DNA Recognition by p53 Tetramers (complex III)                 | Apoptosis/DNA | 1.85 | - <sup>176</sup> C-P-H-H-E <sup>180</sup> - | Kitayner M. <i>et al.</i><br>Mol. Cell 2006, 22, 741    |
| 2ATA_A | Cellular tumor antigen p53 | Structural Basis of DNA Recognition by p53 Tetramers (complex II)                  | Apoptosis/DNA | 2.20 | - <sup>176</sup> C-P-H-H-E <sup>180</sup> - | Kitayner M. <i>et al.</i><br>Mol. Cell 2006, 22, 741    |
| 2ATA_B | Cellular tumor antigen p53 | Structural Basis of DNA Recognition by p53 Tetramers (complex II)                  | Apoptosis/DNA | 2.20 | - <sup>176</sup> C-P-H-H-E <sup>180</sup> - | Kitayner M. <i>et al.</i><br>Mol. Cell 2006, 22, 741    |
| 2ATA_C | Cellular tumor antigen p53 | Structural Basis of DNA Recognition by p53 Tetramers (complex II)                  | Apoptosis/DNA | 2.20 | - <sup>176</sup> C-P-H-H-E <sup>180</sup> - | Kitayner M. <i>et al.</i><br>Mol. Cell 2006, 22, 741    |
| 2ATA_D | Cellular tumor antigen p53 | Structural Basis of DNA Recognition by p53 Tetramers (complex II)                  | Apoptosis/DNA | 2.20 | - <sup>176</sup> C-P-H-H-E <sup>180</sup> - | Kitayner M. <i>et al.</i><br>Mol. Cell 2006, 22, 741    |
| 2AU3_A | DNA primase                | Crosstalk between primase subunits can act to regulate primer synthesis in trans   | Transferase   | 2.00 | - <sup>35</sup> C-P-F-H-P <sup>39</sup> -   | Corn J.E. <i>et al.</i><br>Mol. Cell 2005, 20, 391      |
| 2B8T_A | Thymidine kinase           | Crystal structure of Thymidine Kinase from U.urealyticum in complex with thymidine | Transferase   | 2.00 | - <sup>191</sup> C-R-H-H-H <sup>195</sup> - | Kosinska U. <i>et al.</i><br>FEBS Lett. 2005, 272, 6365 |
| 2B8T_B | Thymidine kinase           | Crystal structure of Thymidine Kinase from U.urealyticum in complex with thymidine | Transferase   | 2.00 | - <sup>191</sup> C-R-H-H-H <sup>195</sup> - | Kosinska U. <i>et al.</i><br>FEBS Lett. 2005, 272, 6365 |

|        |                                          |                                                                                                                                                                                                                                                     |                       |      |                                               |                                                          |
|--------|------------------------------------------|-----------------------------------------------------------------------------------------------------------------------------------------------------------------------------------------------------------------------------------------------------|-----------------------|------|-----------------------------------------------|----------------------------------------------------------|
| 2B8T_C | Thymidine kinase                         | Crystal structure of Thymidine Kinase from <i>U.urealyticum</i> in complex with thymidine                                                                                                                                                           | Transferase           | 2.00 | - <sup>191</sup> C-R-H-H-H <sup>195</sup> -   | Kosinska U. <i>et al.</i><br>FEBS Lett. 2005, 272, 6365  |
| 2B8T_D | Thymidine kinase                         | Crystal structure of Thymidine Kinase from <i>U.urealyticum</i> in complex with thymidine                                                                                                                                                           | Transferase           | 2.00 | - <sup>191</sup> C-R-H-H-H <sup>195</sup> -   | Kosinska U. <i>et al.</i><br>FEBS Lett. 2005, 272, 6365  |
| 2D5B_A | Methionyl-tRNA Synthetase                | Crystal Structure of <i>Thermus Thermophilus</i> Methionyl tRNA synthetase Y225F Mutant obtained in the presence of PEG6000                                                                                                                         | Isomerase             | 1.80 | - <sup>144</sup> C-P-I-H-G <sup>148</sup> -   | Konno M. <i>et al.</i><br>To be published                |
| 2GEQ_A | Cellular tumor antigen p53               | Crystal Structure of a p53 Core Dimer Bound to DNA                                                                                                                                                                                                  | Transcription         | 2.30 | - <sup>173</sup> C-P-H-H-E <sup>177</sup> -   | Ho W.C. <i>et al.</i><br>J. Biol. Chem. 2006, 281, 20494 |
| 2GEQ_B | Cellular tumor antigen p53               | Crystal Structure of a p53 Core Dimer Bound to DNA                                                                                                                                                                                                  | Transcription         | 2.30 | - <sup>173</sup> C-P-H-H-E <sup>177</sup> -   | Ho W.C. <i>et al.</i><br>J. Biol. Chem. 2006, 281, 20494 |
| 2V0C_A | Aminoacyl-tRNA Synthetase                | Leucyl L--tRNA Synthetase from <i>Thermus Thermophilus</i> complexed with a sulphamoyl amalogue Cof Leucyl-adenylate in the synthetic site and N adduct of AMP with 5-Fluoro-1,3-dihydro-1-hydroxy-2,1-Benzoxaborole (AN2690) lin the editing state | Ligase                | 1.85 | - <sup>176</sup> C-W-R-H-E <sup>180</sup> -   | Rock F. <i>et al.</i><br>Science 2007, 316,1759          |
| 2V89_A | VDJ Recombination-Activating Protein 2   | Crystal structure of RAG2-PHD finger in complex with H3K4me3 peptide at 1.1A resolution                                                                                                                                                             | Protein Binding       | 1.10 | - <sup>1478</sup> C-W-R-H-V <sup>1482</sup> - | Matthews A.G.W <i>et al.</i><br>Nature 2007, 450,1106    |
| 2V89_B | VDJ Recombination-Activating Protein 2   | Crystal structure of RAG2-PHD finger in complex with H3K4me3 peptide at 1.1A resolution                                                                                                                                                             | Protein Binding       | 1.10 | - <sup>1478</sup> C-W-R-H-V <sup>1482</sup> - | Matthews A.G.W <i>et al.</i><br>Nature 2007, 450,1106    |
| 2YVR_A | Transcription intermediary factor 1-beta | Crystal structure of MS1043                                                                                                                                                                                                                         | Metal Binding Protein | 1.80 | - <sup>9</sup> C-W-R-H-K <sup>13</sup> -      | Wang H. <i>et al.</i><br>To be published                 |
| 2YVR_B | Transcription intermediary factor 1-beta | Crystal structure of MS1043                                                                                                                                                                                                                         | Metal Binding Protein | 1.80 | - <sup>9</sup> C-W-R-H-K <sup>13</sup> -      | Wang H. <i>et al.</i><br>To be published                 |
| 3D06_A | Cellular tumor antigen p53               | Human p53 core domain with hot spot mutation R249S (I)                                                                                                                                                                                              | Transcription         | 1.20 | - <sup>176</sup> C-P-H-H-E <sup>180</sup> -   | Suad O. <i>et al.</i><br>J. Mol. Biol. 2009, 385, 249    |
| 3D0A_A | Cellular tumor antigen p53               | Human p53 core domain with hot spot mutation R249S and second site suppressor mutation H168R in sequence-specific complex with DNA                                                                                                                  | Transcription         | 1.20 | - <sup>176</sup> C-P-H-H-E <sup>180</sup> -   | Suad O. <i>et al.</i><br>J. Mol. Biol. 2009, 385, 249    |

|        |                                    |                                                                                                                                    |               |      |                                             |                                                                 |
|--------|------------------------------------|------------------------------------------------------------------------------------------------------------------------------------|---------------|------|---------------------------------------------|-----------------------------------------------------------------|
| 3D0A_B | Cellular tumor antigen p53         | Human p53 core domain with hot spot mutation R249S and second site suppressor mutation H168R in sequence-specific complex with DNA | Transcription | 1.20 | - <sup>176</sup> C-P-H-H-E <sup>180</sup> - | Suad O. <i>et al.</i><br>J. Mol. Biol. 2009, 385, 249           |
| 3D0A_C | Cellular tumor antigen p53         | Human p53 core domain with hot spot mutation R249S and second site suppressor mutation H168R in sequence-specific complex with DNA | Transcription | 1.20 | - <sup>176</sup> C-P-H-H-E <sup>180</sup> - | Suad O. <i>et al.</i><br>J. Mol. Biol. 2009, 385, 249           |
| 3D0A_D | Cellular tumor antigen p53         | Human p53 core domain with hot spot mutation R249S and second site suppressor mutation H168R in sequence-specific complex with DNA | Transcription | 1.20 | - <sup>176</sup> C-P-H-H-E <sup>180</sup> - | Suad O. <i>et al.</i><br>J. Mol. Biol. 2009, 385, 24            |
| 3DDT_A | E3 ubiquitin-protein ligase TRIM63 | Crystal structure of the B2 box from MuRF1 in dimeric state                                                                        | Ligase        | 1.90 | - <sup>6</sup> C-K-E-H-E <sup>10</sup> -    | Mrosek M. <i>et al.</i><br>Biochemistry 2008, 47, 10730         |
| 3DDT_B | E3 ubiquitin-protein ligase TRIM63 | Crystal structure of the B2 box from MuRF1 in dimeric state                                                                        | Ligase        | 1.90 | - <sup>6</sup> C-K-E-H-E <sup>10</sup> -    | Mrosek M. <i>et al.</i><br>Biochemistry 2008, 47, 10730         |
| 3DDT_C | E3 ubiquitin-protein ligase TRIM63 | Crystal structure of the B2 box from MuRF1 in dimeric state                                                                        | Ligase        | 1.90 | - <sup>6</sup> C-K-E-H-E <sup>10</sup> -    | Mrosek M. <i>et al.</i><br>Biochemistry 2008, 47, 10730         |
| 3E2I_A | Thymidine kinase                   | Crystal structure of Thymidine Kinase from <i>S. aureus</i>                                                                        | Transferase   | 2.01 | - <sup>183</sup> C-R-A-H-H <sup>187</sup> - | Lam R. <i>et al.</i><br>To be Published                         |
| 3EBE_A | Protein MCM10 homolog              | Crystal structure of <i>xenopus laevis</i> replication initiation factor MCM10 internal domain                                     | Replication   | 2.30 | - <sup>403</sup> C-Q-Y-H-V <sup>407</sup> - | Warren E.M. <i>et al.</i><br>Structure 2008, 16, 1892           |
| 3EBE_B | Protein MCM10 homolog              | Crystal structure of <i>xenopus laevis</i> replication initiation factor MCM10 internal domain                                     | Replication   | 2.30 | - <sup>403</sup> C-Q-Y-H-V <sup>407</sup> - | Warren E.M. <i>et al.</i><br>Structure 2008, 16, 1892           |
| 3EBE_C | Protein MCM10 homolog              | Crystal structure of <i>xenopus laevis</i> replication initiation factor MCM10 internal domain                                     | Replication   | 2.30 | - <sup>403</sup> C-Q-Y-H-V <sup>407</sup> - | Warren E.M. <i>et al.</i><br>Structure 2008, 16, 1892           |
| 3EXJ_A | mouse p53 core domain              | Crystal Structure of a p53 Core Tetramer Bound to DNA                                                                              | Transcription | 2.00 | - <sup>173</sup> C-P-H-H-E <sup>177</sup> - | Malecka K.A. <i>et al.</i><br>Oncogene 2009, 28, 325            |
| 3EXJ_B | mouse p53 core domain              | Crystal Structure of a p53 Core Tetramer Bound to DNA                                                                              | Transcription | 2.00 | - <sup>173</sup> C-P-H-H-E <sup>177</sup> - | Malecka K.A. <i>et al.</i><br>Oncogene 2009, 28, 325            |
| 3EXL_A | mouse p53 core domain              | Crystal Structure of a p53 Core Tetramer Bound to DNA                                                                              | Transcription | 2.20 | - <sup>173</sup> C-P-H-H-E <sup>180</sup> - | Malecka K.A. <i>et al.</i><br>Oncogene 2009, 28, 325            |
| 3IGK_A | Cellular tumor antigen p53         | Diversity in DNA recognition by p53 revealed by crystal structures with Hoogsteen base pairs (p53-DNA complex 2)                   | Transcription | 1.70 | - <sup>176</sup> C-P-H-H-E <sup>180</sup> - | Kitayner M. <i>et al.</i><br>Nat.Struct.Mol.Biol. 2010, 17, 423 |

|        |                                         |                                                                                                                           |                                                             |      |                                               |                                                                       |
|--------|-----------------------------------------|---------------------------------------------------------------------------------------------------------------------------|-------------------------------------------------------------|------|-----------------------------------------------|-----------------------------------------------------------------------|
| 3IGL_A | Cellular tumor antigen p53              | Diversity in DNA recognition by p53 revealed by crystal structures with Hoogsteen base pairs (p53-DNA complex 1)          | Transcription                                               | 1.80 | - <sup>176</sup> C-P-H-H-E <sup>180</sup> -   | Kitayner M. <i>et al.</i> Nat. Struct. Mol. Biol. 2010, 17, 423       |
| 3KMD_A | Cellular tumor antigen p53              | Crystal structure of the p53 core domain bound to a full consensus site as a self-assembled tetramer                      | Transcription                                               | 2.15 | - <sup>176</sup> C-P-H-H-E <sup>180</sup> -   | Chen Y. <i>et al.</i> Structure 2010, 18, 246                         |
| 3KMD_B | Cellular tumor antigen p53              | Crystal structure of the p53 core domain bound to a full consensus site as a self-assembled tetramer                      | Transcription                                               | 2.15 | - <sup>176</sup> C-P-H-H-E <sup>180</sup> -   | Chen Y. <i>et al.</i> Structure 2010, 18, 246                         |
| 3KMD_C | Cellular tumor antigen p53              | Crystal structure of the p53 core domain bound to a full consensus site as a self-assembled tetramer                      | Transcription                                               | 2.15 | - <sup>176</sup> C-P-H-H-E <sup>180</sup> -   | Chen Y. <i>et al.</i> Structure 2010, 18, 246                         |
| 3KMD_D | Cellular tumor antigen p53              | Crystal structure of the p53 core domain bound to a full consensus site as a self-assembled tetramer                      | Transcription                                               | 2.15 | - <sup>176</sup> C-P-H-H-E <sup>180</sup> -   | Chen Y. <i>et al.</i> Structure 2010, 18, 246                         |
| 3KZ8_A | Cellular tumor antigen p53              | Diversity in DNA recognition by p53 revealed by crystal structures with Hoogsteen base pairs (p53-DNA complex 3)          | Transcription                                               | 1.91 | - <sup>176</sup> C-P-H-H-E <sup>180</sup> -   | Kitayner M. <i>et al.</i> Nat. Struct. Mol. Biol. 2010, 17, 423       |
| 3KZ8_B | Cellular tumor antigen p53              | Diversity in DNA recognition by p53 revealed by crystal structures with Hoogsteen base pairs (p53-DNA complex 3)          | Transcription                                               | 1.91 | - <sup>176</sup> C-P-H-H-E <sup>180</sup> -   | Kitayner M. <i>et al.</i> Nat. Struct. Mol. Biol. 2010, 17, 423       |
| 3MHJ_A | Tankyrase-2                             | Human tankyrase 2 - catalytic PARP domain in complex with 1-methyl-3-(trifluoromethyl)-5h-benzo[c][1,8]naphtyridine-6-one | Transferase                                                 | 1.80 | - <sup>1081</sup> C-P-V-H-K <sup>1085</sup> - | Wahlberg E. <i>et al.</i> Nat. Biotechnol. 2012, 30, 283              |
| 3MHJ_B | Tankyrase-2                             | Human tankyrase 2 - catalytic PARP domain in complex with 1-methyl-3-(trifluoromethyl)-5h-benzo[c][1,8]naphtyridine-6-one | Transferase                                                 | 1.80 | - <sup>1081</sup> C-P-V-H-K <sup>1085</sup> - | Wahlberg E. <i>et al.</i> Nat. Biotechnol. 2012, 30, 283              |
| 3MHS_A | Ubiquitin carboxyl-terminal hydrolase 8 | Structure of the SAGA Ubp8/Sgf11/Sus1/Sgf73 DUB module bound to ubiquitin aldehyde                                        | Hydrolase/<br>transcription<br>regulator/protein<br>binding | 1.89 | - <sup>273</sup> C-I-V-H-T <sup>277</sup> -   | Samara N.L. <i>et al.</i> Science 2010, 328, 1025                     |
| 3NY1_A | E3 ubiquitin-protein ligase UBR1        | Structure of the ubr-box of the UBR1 ubiquitin ligase                                                                     | Ligase                                                      | 2.09 | - <sup>163</sup> C-V-N-H-E <sup>167</sup> -   | Matta-Camacho E. <i>et al.</i> Nat. Struct. Mol. Biol. 2010, 17, 1182 |
| 3NY1_B | E3 ubiquitin-protein ligase UBR1        | Structure of the ubr-box of the UBR1 ubiquitin ligase                                                                     | Ligase                                                      | 2.09 | - <sup>163</sup> C-V-N-H-E <sup>167</sup> -   | Matta-Camacho E. <i>et al.</i> Nat. Struct. Mol. Biol. 2010, 17, 1182 |
| 3OHR_A | Putative fructokinase                   | Crystal structure of fructokinase from <i>bacillus subtilis</i> complexed with ADP                                        | Transferase                                                 | 1.66 | - <sup>168</sup> C-P-Y-H-G <sup>172</sup> -   | Nocek B. <i>et al.</i> J. Mol. Biol. 2011, 406,                       |

|        |                                            |                                                                                            |                     |      |                                             |                                                              |
|--------|--------------------------------------------|--------------------------------------------------------------------------------------------|---------------------|------|---------------------------------------------|--------------------------------------------------------------|
| 3PLW_A | Recombination enhancement function protein | Ref protein from P1 bacteriophage                                                          | Hydrolase           | 1.40 | - <sup>99</sup> C-P-Y-H-H <sup>103</sup> -  | Gruenig M.C. <i>et al.</i><br>J. Biol. Chem. 2011, 286, 8240 |
| 3Q01_A | Cellular tumor antigen p53                 | An induced fit mechanism regulates p53 DNA binding kinetics to confer sequence specificity | Antitumor protein   | 2.10 | - <sup>176</sup> C-P-H-H-E <sup>180</sup> - | Petty T.J. <i>et al.</i><br>Embo J. 2011, 30, 2167           |
| 3Q01_B | Cellular tumor antigen p53                 | An induced fit mechanism regulates p53 DNA binding kinetics to confer sequence specificity | Antitumor protein   | 2.10 | - <sup>176</sup> C-P-H-H-E <sup>180</sup> - | Petty T.J. <i>et al.</i><br>Embo J. 2011, 30, 2167           |
| 3Q05_A | Cellular tumor antigen p53                 | An induced fit mechanism regulates p53 DNA binding kinetics to confer sequence specificity | Antitumor protein   | 2.40 | - <sup>176</sup> C-P-H-H-E <sup>180</sup> - | Petty T.J. <i>et al.</i><br>Embo J. 2011, 30, 2167           |
| 3Q05_B | Cellular tumor antigen p53                 | An induced fit mechanism regulates p53 DNA binding kinetics to confer sequence specificity | Antitumor protein   | 2.40 | - <sup>176</sup> C-P-H-H-E <sup>180</sup> - | Petty T.J. <i>et al.</i><br>Embo J. 2011, 30, 2167           |
| 3Q05_C | Cellular tumor antigen p53                 | An induced fit mechanism regulates p53 DNA binding kinetics to confer sequence specificity | Antitumor protein   | 2.40 | - <sup>176</sup> C-P-H-H-E <sup>180</sup> - | Petty T.J. <i>et al.</i><br>Embo J. 2011, 30, 2167           |
| 3Q05_D | Cellular tumor antigen p53                 | An induced fit mechanism regulates p53 DNA binding kinetics to confer sequence specificity | Antitumor protein   | 2.40 | - <sup>176</sup> C-P-H-H-E <sup>180</sup> - | Petty T.J. <i>et al.</i><br>Embo J. 2011, 30, 2167           |
| 3Q1D_A | Tripartite motif-containing protein 54     | The B-box domain of Trim54                                                                 | Ligase              | 2.15 | - <sup>126</sup> C-E-E-H-E <sup>130</sup> - | Walker J.R. <i>et al.</i><br>To be published                 |
| 3RAY_A | PR domain-containing protein 11            | Crystal structure of Methyltransferase domain of human PR domain-containing protein 11     | Transcription       | 1.73 | - <sup>43</sup> C-P-N-H-G <sup>47</sup> -   | Dong A. <i>et al.</i><br>To be published                     |
| 3RYM_A | Amicyanin                                  | Structure of Oxidized M98K mutant of Amicyanin                                             | Electron Transport  | 1.70 | - <sup>92</sup> C-P-N-H-P <sup>96</sup> -   | Sukumar N. <i>et al.</i><br>J. Inorg. Chem. 2011, 105, 1638  |
| 3RYM_B | Amicyanin                                  | Structure of Oxidized M98K mutant of Amicyanin                                             | Electron Transport  | 1.70 | - <sup>92</sup> C-P-N-H-P <sup>96</sup> -   | Sukumar N. <i>et al.</i><br>J. Inorg. Chem. 2011, 105, 1638  |
| 3RYM_C | Amicyanin                                  | Structure of Oxidized M98K mutant of Amicyanin                                             | Electron Transport  | 1.70 | - <sup>92</sup> C-P-N-H-P <sup>96</sup> -   | Sukumar N. <i>et al.</i><br>J. Inorg. Chem. 2011, 105, 1638  |
| 3RYM_D | Amicyanin                                  | Structure of Oxidized M98K mutant of Amicyanin                                             | Electron Transport  | 1.70 | - <sup>92</sup> C-P-N-H-P <sup>96</sup> -   | Sukumar N. <i>et al.</i><br>J. Inorg. Chem. 2011, 105, 1638  |
| 3VRH_A | Putative uncharacterized protein PH0300    | Crystal structure of ph0300                                                                | RNA Binding Protein | 2.10 | - <sup>22</sup> C-E-E-H-F <sup>26</sup> -   | Nakagawa H. <i>et al.</i><br>Proteins 2013, 81,              |



|             |                                          |                                                                                                                                    |                     |      |                                               |                                                             |
|-------------|------------------------------------------|------------------------------------------------------------------------------------------------------------------------------------|---------------------|------|-----------------------------------------------|-------------------------------------------------------------|
| 4C1Q_A      | Histone-Lysine N-methyltransferase PRDM9 | Crystal structure of the PRDM9 SET domain in complex with H3K4me2 and AdoHcy.                                                      | Transferase         | 2.30 | - <sup>216</sup> C-P-N-H-G <sup>220</sup> -   | Wu H. <i>et al.</i><br>Cell Rep. 2013, 5, 13                |
| 4C1Q_B      | Histone-Lysine N-methyltransferase PRDM9 | Crystal structure of the PRDM9 SET domain in complex with H3K4me2 and AdoHcy.                                                      | Transferase         | 2.30 | - <sup>216</sup> C-P-N-H-G <sup>220</sup> -   | Wu H. <i>et al.</i><br>Cell Rep. 2013, 5, 13                |
| 4GNE_A<br>2 | Histone-lysine N-methyltransferase NSD3  | Crystal Structure of NSD3 tandem PHD5-C5HCH domains complexed with H3 peptide 1-7                                                  | Transferase         | 1.47 | - <sup>1405</sup> C-S-E-H-E <sup>1409</sup> - | He C. <i>et al.</i><br>J. Biol. Chem. 2013, 288, 4692       |
| 4HCG_A      | Cupredoxin 1                             | Uncharacterized Cupredoxin-like Domain Protein Cupredoxin_1 with Zinc bound from <i>Bacillus anthracis</i>                         | Oxidoreductase      | 1.85 | - <sup>113</sup> C-R-Y-H-L <sup>117</sup> -   | Kim Y. <i>et al.</i><br>To be published                     |
| 4HCG_B      | Cupredoxin 1                             | Uncharacterized Cupredoxin-like Domain Protein Cupredoxin_1 with Zinc bound from <i>Bacillus anthracis</i>                         | Oxidoreductase      | 1.85 | - <sup>113</sup> C-R-Y-H-L <sup>117</sup> -   | Kim Y. <i>et al.</i><br>To be published                     |
| 4HJE_A      | Cellular tumor antigen p53               | Crystal structure of p53 core domain in complex with DNA                                                                           | Transcription       | 1.91 | - <sup>176</sup> C-P-H-H-E <sup>180</sup> -   | Chen Y. <i>et al.</i><br>Nucleic Acids Res. 2013, 41, 8368  |
| 4HJE_B      | Cellular tumor antigen p53               | Crystal structure of p53 core domain in complex with DNA                                                                           | Transcription       | 1.91 | - <sup>176</sup> C-P-H-H-E <sup>180</sup> -   | Chen Y. <i>et al.</i><br>Nucleic Acids Res. 2013, 41, 8368  |
| 4HJE_C      | Cellular tumor antigen p53               | Crystal structure of p53 core domain in complex with DNA                                                                           | Transcription       | 1.91 | - <sup>176</sup> C-P-H-H- E <sup>180</sup> -  | Chen Y. <i>et al.</i><br>Nucleic Acids Res. 2013, 41, 8368  |
| 4HJE_D      | Cellular tumor antigen p53               | Crystal structure of p53 core domain in complex with DNA                                                                           | Transcription       | 1.91 | - <sup>176</sup> C-P-H-H-E <sup>180</sup> -   | Chen Y. <i>et al.</i><br>Nucleic Acids Res. 2013, 41, 8368  |
| 4IBU_A      | Cellular tumor antigen p53               | Human p53 core domain with hot spot mutation R273C and second-site suppressor mutation T284R in sequence-specific complex with DNA | DNA Binding Protein | 1.70 | - <sup>176</sup> C-P-H-H-E <sup>180</sup> -   | Eldar A. <i>et al.</i><br>Nucleic Acids Res. 2013, 41, 8748 |
| 4IBU_B      | Cellular tumor antigen p53               | Human p53 core domain with hot spot mutation R273C and second-site suppressor mutation T284R in sequence-specific complex with DNA | DNA Binding Protein | 1.70 | - <sup>176</sup> C-P-H-H-E <sup>180</sup> -   | Eldar A. <i>et al.</i><br>Nucleic Acids Res. 2013, 41, 8748 |
| 4IBU_C      | Cellular tumor antigen p53               | Human p53 core domain with hot spot mutation R273C and second-site suppressor mutation T284R in sequence-specific complex with DNA | DNA Binding Protein | 1.70 | - <sup>176</sup> C-P-H-H-E <sup>180</sup> -   | Eldar A. <i>et al.</i><br>Nucleic Acids Res. 2013, 41, 8748 |
| 4IBU_D      | Cellular tumor antigen p53               | Human p53 core domain with hot spot mutation R273C and second-site suppressor mutation                                             | DNA Binding Protein | 1.70 | - <sup>176</sup> C-P-H-H-E <sup>180</sup> -   | Eldar A. <i>et al.</i><br>Nucleic Acids Res.                |

|        |                                          |                                                                                                                                    |                         |      |                                               |                                                                                  |
|--------|------------------------------------------|------------------------------------------------------------------------------------------------------------------------------------|-------------------------|------|-----------------------------------------------|----------------------------------------------------------------------------------|
|        |                                          | T284R in sequence-specific complex with DNA                                                                                        |                         |      |                                               | 2013, 41, 8748                                                                   |
| 4IBV_A | Cellular tumor antigen p53               | Human p53 core domain with hot spot mutation R273C and second-site suppressor mutation S240R in sequence-specific complex with DNA | DNA Binding Protein     | 2.10 | - <sup>176</sup> C-P-H-H-E <sup>180</sup> -   | Eldar A. <i>et al.</i> Nucleic Acids Res. 2013, 41, 8748                         |
| 4IBW_A | Cellular tumor antigen p53               | Human p53 core domain with hot spot mutation R273H and second-site suppressor mutation T284R in sequence-specific complex with DNA | DNA Binding Protein     | 1.79 | - <sup>176</sup> C-P-H-H-E <sup>180</sup> -   | Eldar A. <i>et al.</i> Nucleic Acids Res. 2013, 41, 8748                         |
| 4IJD_A | Histone-lysine N-methyltransferase PRDM9 | Crystal structure of methyltransferase domain of human PR domain-containing protein 9                                              | Transferase             | 2.15 | - <sup>216</sup> C-A-A-H-G <sup>220</sup> -   | Dombrovski L. <i>et al.</i> To be published                                      |
| 4IJD_B | Histone-lysine N-methyltransferase PRDM9 | Crystal structure of methyltransferase domain of human PR domain-containing protein 9                                              | Transferase             | 2.15 | - <sup>216</sup> C-A-A-H-G <sup>220</sup> -   | Dombrovski L. <i>et al.</i> To be published                                      |
| 4IXJ_A | Fimbrial protein (PilJ)                  | The structure of PilJ, a Type IV pilin from <i>Clostridium difficile</i>                                                           | Cell Adhesion           | 1.98 | - <sup>111</sup> C-T-K-H-P <sup>115</sup> -   | Piepenbrink K.H. <i>et al.</i> J. Biol. Chem. 2014, 289, 4334                    |
| 4IXJ_B | Fimbrial protein (PilJ)                  | The structure of PilJ, a Type IV pilin from <i>Clostridium difficile</i>                                                           | Cell Adhesion           | 1.98 | - <sup>111</sup> C-T-K-H-P <sup>115</sup> -   | Piepenbrink K.H. <i>et al.</i> J. Biol. Chem. 2014, 289, 4334                    |
| 4LJO_A | E3 ubiquitin-protein ligase RNF31        | Structure of an active ligase (HOIP)/ubiquitin transfer complex                                                                    | Ligase                  | 1.56 | - <sup>998</sup> C-Q-A-H-Y <sup>1002</sup> -  | Stieglitz B. <i>et al.</i> Nature 2013, 503, 422                                 |
| 4NN2_A | PHD finger protein 6                     | Protein Crystal Structure of Human Borjeson-Forssman-Lehmann Syndrome Associated Protein PHF6                                      | Transcription           | 1.47 | - <sup>326</sup> C-K-N-H-S <sup>330</sup> -   | Liu Z. <i>et al.</i> J. Biol. Chem. 2014                                         |
| 4NN2_B | PHD finger protein 6                     | Protein Crystal Structure of Human Borjeson-Forssman-Lehmann Syndrome Associated Protein PHF6                                      | Transcription           | 1.47 | - <sup>326</sup> C-K-N-H-S <sup>330</sup> -   | Liu Z. <i>et al.</i> J. Biol. Chem. 2014                                         |
| 4QO1_B | Cellular tumor antigen p53               | p53 DNA binding domain in complex with Nb139                                                                                       | Apoptosis transcription | 1.92 | - <sup>176</sup> C-P-H-H-E <sup>180</sup> -   | Bethuyne J. <i>et al.</i> Nucleic Acids Res. 2014, 42, 12928                     |
| 4RH4_A | Pseudoazurin                             | Zinc-substituted pseudoazurin solved by S/Zn-SAD phasing                                                                           | Metal Binding Protein   | 1.60 | - <sup>78</sup> C-T-P-H-Y <sup>82</sup> -     | Gessmann R. <i>et al.</i> Acta Crystallogr. F Struct. Biol. Commun. 2015, 71, 19 |
| 4TOR_A | Tankyrase-1                              | Crystal structure of Tankyrase 1 with IWR-8                                                                                        | Transferase             | 1.50 | - <sup>1234</sup> C-P-T-H-K <sup>1238</sup> - | Kulak O. <i>et al.</i> Mol. Cell. Biol. 2015, 35, 2425                           |

|        |                                              |                                                                                                |                                          |      |                                               |                                                                     |
|--------|----------------------------------------------|------------------------------------------------------------------------------------------------|------------------------------------------|------|-----------------------------------------------|---------------------------------------------------------------------|
| 4TOR_B | Tankyrase-1                                  | Crystal structure of Tankyrase 1 with IWR-8                                                    | Transferase                              | 1.50 | - <sup>1234</sup> C-P-T-H-K <sup>1238</sup> - | Kulak O. <i>et al.</i><br>Mol. Cell. Biol. 2015,<br>35, 2425        |
| 4TOR_C | Tankyrase-1                                  | Crystal structure of Tankyrase 1 with IWR-8                                                    | Transferase                              | 1.50 | - <sup>1234</sup> C-P-T-H-K <sup>1238</sup> - | Kulak O. <i>et al.</i><br>Mol. Cell. Biol. 2015,<br>35, 2425        |
| 4TOR_D | Tankyrase-1                                  | Crystal structure of Tankyrase 1 with IWR-8                                                    | Transferase                              | 1.50 | - <sup>1234</sup> C-P-T-H-K <sup>1238</sup> - | Kulak O. <i>et al.</i><br>Mol. Cell. Biol. 2015,<br>35, 2425        |
| 4YBG_A | Protein maelstrom                            | Crystal structure of the MAEL domain of<br><i>Drosophila melanogaster</i> Maelstrom            | Hydrolase                                | 1.60 | - <sup>288</sup> C-Q-Y-H-E <sup>292</sup> -   | Matsumoto N. <i>et al.</i><br>Cell. Rep. 2015, 11,<br>366           |
| 5AF0_A | Maelstrom                                    | MAEL domain from Bombyx mori Maelstrom                                                         | Unknown Protein                          | 2.40 | - <sup>290</sup> C-E-R-H-E <sup>294</sup> -   | Chen K. <i>et al.</i><br>RNA 2015, 21, 833                          |
| 5AF0_B | Maelstrom                                    | MAEL domain from Bombyx mori Maelstrom                                                         | Unknown Protein                          | 2.40 | - <sup>290</sup> C-E-R-H-E <sup>294</sup> -   | Chen K. <i>et al.</i><br>RNA 2015, 21, 833                          |
| 5AF0_C | Maelstrom                                    | MAEL domain from Bombyx mori Maelstrom                                                         | Unknown Protein                          | 2.40 | - <sup>290</sup> C-E-R-H-E <sup>294</sup> -   | Chen K. <i>et al.</i><br>RNA 2015, 21, 833                          |
| 5AF0_D | Maelstrom                                    | MAEL domain from Bombyx mori Maelstrom                                                         | Unknown Protein                          | 2.40 | - <sup>290</sup> C-E-R-H-E <sup>294</sup> -   | Chen K. <i>et al.</i><br>RNA 2015, 21, 833                          |
| 5C5R_A | Tankyrase-2                                  | Crystal structure of Human Tankyrase-2 in<br>complex with a pyranopyridone inhibitor           | Transferase/<br>Transferase<br>inhibitor | 1.55 | - <sup>1081</sup> C-P-V-H-K <sup>1085</sup> - | De Vincente J. <i>et al.</i><br>Acs Med.Chem.Lett.<br>2015, 6, 1019 |
| 5C5R_B | Tankyrase-2                                  | Crystal structure of Human Tankyrase-2 in<br>complex with a pyranopyridone inhibitor           | Transferase/<br>Transferase<br>inhibitor | 1.55 | - <sup>1081</sup> C-P-V-H-K <sup>1085</sup> - | De Vincente J. <i>et al.</i><br>Acs Med.Chem.Lett.<br>2015, 6, 1019 |
| 5EIU_A | TRIM protein-E3 ligase<br>Chimera            | Mini TRIM5 B-box 2 dimer C2 crystal form                                                       | Ligase                                   | 1.91 | - <sup>97</sup> C-A-R-H-G <sup>101</sup> -    | Wagner J.M. <i>et al.</i><br>Elife, 2016, 5                         |
| 5FV3_A | Lysine-specific demethylase<br>5B            | Crystal structure of human JARID1B construct<br>c2 in complex with N- Oxalylglycine            | Oxidoreductase                           | 2.37 | - <sup>715</sup> C-L-H-H-V <sup>719</sup> -   | Johansson C. <i>et al.</i> ,<br>Nat. Chem. Biol. 2016,<br>12, 539   |
| 5O6C_A | E3 ubiquitin-protein ligase<br>MYCBP2        | Crystal structure of a threonine-selective RCR<br>E3 ligase                                    | Ligase                                   | 1.75 | - <sup>4549</sup> C-P-K-H-G <sup>4553</sup> - | Pao K.C. <i>et al.</i><br>Nature 2018, 556, 381                     |
| 5OLM_A | E3 ubiquitin-protein ligase<br>TRIM21        | Intracellular antibody signalling is regulated by<br>phosphorylation of the Fc receptor TRIM21 | Antiviral protein                        | 1.95 | - <sup>92</sup> C-A-V-H-G <sup>96</sup> -     | Dickson C. <i>et al.</i><br>Elife 2018, 7                           |
| 5YKN_A | Probable lysine-specific<br>demethylase JM14 | Crystal structure of Arabidopsis thaliana JM14<br>catalytic domain                             | Gene regulation                          | 2.30 | - <sup>542</sup> C-L-I-H-A <sup>546</sup> -   | Yang Z. <i>et al.</i><br>Plant Cell 2017,<br>30,167                 |
| 5ZTB_A | Sulfur carrier protein TtuB                  | Structure of Sulfurtransferase                                                                 | RNA binding<br>protein/                  | 2.20 | - <sup>22</sup> C-R-E-H-Y <sup>26</sup> -     | Chen M. <i>et al.</i><br>Commun Biol 2020, 3,                       |

|        |                                          |                                                                          |                         |      |                                             |                                                          |
|--------|------------------------------------------|--------------------------------------------------------------------------|-------------------------|------|---------------------------------------------|----------------------------------------------------------|
|        |                                          |                                                                          | Transferase             |      |                                             | 168                                                      |
| 6LND_K | Transposition protein TniQ               | Crystal structure of transposition protein TniQ                          | DNA binding protein     | 2.00 | - <sup>150</sup> C-H-S-H-N <sup>154</sup> - | Wang B. <i>et al.</i><br>Cell Res 2020, 30, 185          |
| 6MM1_A | Histone-lysine N-methyltransferase EHMT2 | Structure of the cysteine-rich region from human EHMT2                   | Transferase             | 1.90 | - <sup>65</sup> C-E-T-H-R <sup>69</sup> -   | Kerchner K.M. <i>et al.</i><br>To be published           |
| 6U04_A | Histone H3.3, BRPF1, Peregrin            | Crystal structure of human BRPF1 PZP bound to histone H3 tail            | Transcription           | 2.20 | - <sup>444</sup> C-D-I-H-T <sup>448</sup> - | Klein B.J. <i>et al.</i><br>Structure 2020, 28, 105      |
| 6VHF_A | PHD-type domain-containing protein       | Crystal structure of RbBP5 interacting domain of Cfp1                    | Peptide binding protein | 2.31 | - <sup>456</sup> C-K-P-H-N <sup>460</sup> - | Yang Y. <i>et al.</i><br>Nucleic Acids Res 2020, 48, 421 |
| 6ZSL_B | SARS-CoV-2 helicase NSP13                | Crystal structure of the SARS-CoV-2 helicase at 1.94 Angstrom resolution | Hydrolase               | 1.94 | - <sup>72</sup> C-K-S-H-K <sup>76</sup> -   | Newman J.A. <i>et al.</i><br>To be published             |
| 7D2T_B | Ras suppressor protein 1                 | Crystal structure of Rsu1/PINCH1_LIM45C complex                          | Protein binding         | 2.20 | - <sup>240</sup> C-E-T-H-Y <sup>244</sup> - | Yang H. <i>et al.</i><br>Elife 2020, 10                  |

<sup>a</sup>When the pdb contains more than one chain, the identifier of the chain containing the C-X<sub>1</sub>-X<sub>2</sub>-H-X<sub>3</sub> motif is specified.

**Table S3.** Non-redundant C-X<sub>1</sub>-X<sub>2</sub>-H-X<sub>3</sub> motif and their classification (X<sub>1</sub>, X<sub>2</sub>, X<sub>3</sub> = any amino acid). The amino acids are indicated as single letter codes.

| Cluster 1 | Cluster 2 | Cluster 3 | Cluster 4 | Outlier 5 | Outlier 7 |
|-----------|-----------|-----------|-----------|-----------|-----------|
| CRSHT     | CPIHG     | CEHHL     | CWRHE     | CPFHP     | CKPHN     |
| CPHHE     | CPYHG     | CPVHK     | CNVHK     |           |           |
| CQEHS     | CPNHG     | CPTHK     | CKEHE     |           |           |
| CRHHH     | CRYHL     |           | CEEHE     |           |           |
| CNEHV     | CAAHG     |           | CTPHP     |           |           |
| CRAHH     | CTKHP     |           |           |           |           |
| CQYHV     | CTPHY     |           |           |           |           |
| CIVHT     | CARHG     |           |           |           |           |
| CVNHE     | CPKHG     |           |           |           |           |
| CRWHH     | CAVHG     |           |           |           |           |
| CEEHF     | CHSHN     |           |           |           |           |
| CKDHE     |           |           |           |           |           |
| CQAHY     |           |           |           |           |           |
| CKNHS     |           |           |           |           |           |
| CQYHE     |           |           |           |           |           |
| CERHE     |           |           |           |           |           |
| CLHHV     |           |           |           |           |           |
| CLIHA     |           |           |           |           |           |
| CREHY     |           |           |           |           |           |
| CETHR     |           |           |           |           |           |
| CDIHT     |           |           |           |           |           |
| CKSHK     |           |           |           |           |           |
| CETHY     |           |           |           |           |           |

**Table S4.** Database entries: conformational and metal coordination parameters for each C-X<sub>1</sub>-X<sub>2</sub>-H-X<sub>3</sub> motif (X<sub>1</sub>, X<sub>2</sub>, X<sub>3</sub> = any amino acid). Angles are expressed in degrees and distances are expressed in angstroms. The centroid of each cluster is highlighted in bold.

| PDB code <sup>a</sup> | C-X <sub>1</sub> -X <sub>2</sub> -H-X <sub>3</sub> motif | $\phi_{i+1}$ | $\psi_{i+1}$ | $\phi_{i+2}$ | $\psi_{i+2}$ | $\phi_{i+3}$ | $\psi_{i+3}$ | $\chi^1_{\text{Cys}}$ | $\chi^1_{\text{His}}$ | d(S $\gamma$ -Zn) | d(N $\delta$ -Zn) | S $\gamma$ -Zn-N $\delta$ Angle | C $\beta$ -S $\gamma$ -Zn Angle | QR-N $\delta$ -Zn Angle |
|-----------------------|----------------------------------------------------------|--------------|--------------|--------------|--------------|--------------|--------------|-----------------------|-----------------------|-------------------|-------------------|---------------------------------|---------------------------------|-------------------------|
| <b>Cluster 1</b>      |                                                          |              |              |              |              |              |              |                       |                       |                   |                   |                                 |                                 |                         |
| 1T4W_A                | CRSHT                                                    | -58.4        | -48.6        | -67.5        | -33.7        | -77.9        | -28.5        | 74.4                  | -82.0                 | 2.4               | 2.0               | 103.3                           | 108.0                           | 169.0                   |
| 1TSR_A                | CPHHE                                                    | -66.4        | -44.7        | -46.6        | -53.8        | -62.6        | -53.2        | 73.8                  | -67.0                 | 2.3               | 2.0               | 107.2                           | 109.7                           | 172.3                   |
| 1TSR_B                | CPHHE                                                    | -54.8        | -47.1        | -56.8        | -61.8        | -57.7        | -32.0        | 74.6                  | -71.5                 | 2.3               | 2.1               | 103.0                           | 111.0                           | 165.7                   |
| 1TSR_C                | CPHHE                                                    | -64.2        | -34.7        | -53.7        | -70.4        | -57.0        | -18.5        | 62.4                  | -89.1                 | 2.4               | 2.1               | 101.9                           | 110.2                           | 169.0                   |
| 1TUP_A                | CPHHE                                                    | -66.8        | -43.6        | -47.5        | -53.4        | -62.4        | -53.4        | 74.1                  | -66.2                 | 2.3               | 2.0               | 107.6                           | 110.0                           | 172.5                   |
| 1TUP_B                | CPHHE                                                    | -55.8        | -47.3        | -56.6        | -61.7        | -57.9        | -31.7        | 74.3                  | -71.6                 | 2.3               | 2.1               | 102.5                           | 110.7                           | 165.7                   |
| 1TUP_C                | CPHHE                                                    | -64.3        | -34.8        | -53.4        | -71.5        | -55.6        | -17.5        | 63.0                  | -88.6                 | 2.4               | 2.1               | 101.6                           | 109.1                           | 169.0                   |
| 1VFY_A                | CQEHS                                                    | -57.9        | -42.1        | -59.8        | -29.7        | -105.0       | 15.9         | 68.1                  | -67.1                 | 2.3               | 2.1               | 96.1                            | 114.0                           | 174.2                   |
| 1YCS_A                | CPHHE                                                    | -42.9        | -49.8        | -65.5        | -49.6        | -62.0        | -40.6        | 70.4                  | -87.9                 | 2.4               | 1.9               | 103.3                           | 112.3                           | 173.2                   |
| 2AC0_A                | CPHHE                                                    | -56.2        | -41.0        | -59.4        | -52.7        | -68.5        | -35.6        | 68.7                  | -77.7                 | 2.3               | 1.9               | 104.1                           | 114.6                           | 176.3                   |
| 2AC0_B                | CPHHE                                                    | -57.8        | -37.6        | -63.2        | -55.5        | -75.1        | -27.1        | 72.5                  | -80.1                 | 2.3               | 2.1               | 102.7                           | 109.5                           | 176.8                   |
| 2AC0_C                | CPHHE                                                    | -58.7        | -32.3        | -69.1        | -53.2        | -72.8        | -31.0        | 72.3                  | -79.8                 | 2.4               | 2.1               | 100.5                           | 112.5                           | 172.6                   |
| 2AC0_D                | CPHHE                                                    | -57.0        | -35.3        | -66.3        | -53.0        | -67.8        | -33.0        | 73.4                  | -79.1                 | 2.4               | 2.0               | 101.1                           | 107.6                           | 178.5                   |
| 2AHI_A                | CPHHE                                                    | -57.6        | -37.3        | -59.2        | -54.9        | -71.9        | -29.4        | 69.6                  | -77.5                 | 2.4               | 2.0               | 102.8                           | 113.7                           | 174.2                   |
| 2AHI_B                | CPHHE                                                    | -60.5        | -38.6        | -64.7        | -54.9        | -67.0        | -30.9        | 74.6                  | -75.2                 | 2.4               | 2.1               | 102.4                           | 110.8                           | 174.0                   |
| 2AHI_C                | CPHHE                                                    | -54.4        | -36.0        | -67.8        | -53.6        | -70.3        | -29.5        | 71.5                  | -76.5                 | 2.4               | 2.1               | 102.8                           | 110.5                           | 176.6                   |
| 2AHI_D                | CPHHE                                                    | -54.3        | -36.8        | -67.8        | -50.1        | -69.4        | -32.8        | 71.4                  | -77.1                 | 2.4               | 2.0               | 102.6                           | 109.4                           | 174.7                   |
| 2ATA_A                | CPHHE                                                    | -60.1        | -32.9        | -70.6        | -49.9        | -71.1        | -30.8        | 70.5                  | -74.5                 | 2.4               | 1.9               | 102.4                           | 111.2                           | 173.6                   |

|        |       |       |       |       |       |        |       |      |       |     |     |       |       |       |
|--------|-------|-------|-------|-------|-------|--------|-------|------|-------|-----|-----|-------|-------|-------|
| 2ATA_B | CPHHE | -54.9 | -40.5 | -57.1 | -54.6 | -74.4  | -32.4 | 67.7 | -75.3 | 2.2 | 2.2 | 101.2 | 116.8 | 171.2 |
| 2ATA_C | CPHHE | -57.2 | -31.0 | -72.3 | -55.2 | -68.8  | -28.2 | 75.3 | -77.1 | 2.4 | 2.0 | 104.2 | 109.2 | 171.6 |
| 2ATA_D | CPHHE | -53.8 | -38.2 | -62.6 | -54.6 | -67.6  | -30.9 | 71.8 | -78.1 | 2.4 | 2.0 | 98.5  | 111.4 | 172.0 |
| 2B8T_A | CRHHH | -52.1 | -48.0 | -57.3 | -35.2 | -101.0 | 15.3  | 63.7 | -65.6 | 2.3 | 2.1 | 94.1  | 117.6 | 165.7 |
| 2B8T_B | CRHHH | -57.6 | -41.1 | -62.8 | -34.4 | -95.5  | 8.4   | 64.8 | -69.9 | 2.4 | 2.1 | 100.5 | 116.6 | 170.2 |
| 2B8T_C | CRHHH | -54.8 | -48.4 | -61.1 | -29.1 | -101.4 | 9.2   | 66.5 | -67.1 | 2.4 | 2.1 | 88.4  | 111.4 | 163.4 |
| 2B8T_D | CRHHH | -53.9 | -45.0 | -61.9 | -36.0 | -94.4  | 11.3  | 65.8 | -70.6 | 2.3 | 2.1 | 93.7  | 115.0 | 170.7 |
| 2GEQ_A | CPHHE | -56.6 | -30.2 | -68.9 | -53.6 | -69.2  | -27.1 | 72.9 | -75.1 | 2.3 | 2.1 | 109.1 | 111.4 | 172.2 |
| 2GEQ_B | CPHHE | -54.5 | -40.5 | -58.9 | -53.1 | -71.9  | -27.7 | 68.5 | -78.6 | 2.3 | 2.1 | 105.8 | 113.2 | 170.4 |
| 2V89_A | CNEHV | -61.4 | -28.5 | -75.6 | -29.1 | -115.9 | -16.9 | 78.8 | -64.6 | 2.3 | 2.0 | 101.7 | 108.9 | 167.0 |
| 2V89_B | CNEHV | -62.8 | -28.9 | -71.7 | -27.2 | -114.0 | -5.6  | 75.4 | -64.2 | 2.3 | 2.1 | 101.2 | 108.8 | 166.5 |
| 3D06_A | CPHHE | -54.6 | -41.8 | -60.8 | -49.7 | -72.7  | -31.6 | 71.6 | -79.5 | 2.3 | 2.0 | 102.2 | 110.4 | 173.9 |
| 3D0A_A | CPHHE | -54.9 | -37.9 | -60.6 | -56.8 | -69.2  | -33.1 | 70.0 | -80.9 | 2.3 | 2.0 | 103.8 | 114.5 | 170.8 |
| 3D0A_B | CPHHE | -57.1 | -34.6 | -64.5 | -55.5 | -69.5  | -30.0 | 69.2 | -76.0 | 2.4 | 2.0 | 102.8 | 112.9 | 173.4 |
| 3D0A_C | CPHHE | -54.1 | -39.1 | -62.9 | -52.8 | -71.6  | -29.7 | 73.4 | -76.8 | 2.3 | 1.8 | 103.4 | 108.9 | 167.9 |
| 3D0A_D | CPHHE | -57.1 | -31.1 | -69.5 | -53.9 | -66.7  | -33.2 | 76.3 | -74.3 | 2.3 | 2.1 | 103.6 | 107.7 | 177.3 |
| 3E2I_A | CRAHH | -50.8 | -42.0 | -65.5 | -21.0 | -117.0 | 4.9   | 64.4 | -63.8 | 2.2 | 2.3 | 88.8  | 119.4 | 163.2 |
| 3EBE_A | CQYHV | -46.3 | -54.3 | -60.3 | -40.7 | -83.8  | -21.2 | 71.6 | -72.5 | 2.2 | 2.0 | 102.2 | 113.7 | 165.5 |
| 3EBE_B | CQYHV | -71.6 | -22.9 | -68.8 | -33.0 | -111.0 | -5.1  | 72.4 | -70.2 | 2.4 | 2.0 | 107.5 | 112.2 | 168.8 |
| 3EBE_C | CQYHV | -60.6 | -27.2 | -80.5 | -18.0 | -114.6 | -10.9 | 69.9 | -72.5 | 2.3 | 2.0 | 100.3 | 109.9 | 175.8 |
| 3EXJ_A | CPHHE | -53.7 | -39.5 | -67.6 | -58.3 | -63.7  | -31.9 | 69.3 | -72.6 | 2.4 | 2.2 | 102.1 | 111.6 | 175.4 |

|               |              |              |              |              |              |              |              |             |              |            |            |              |              |              |
|---------------|--------------|--------------|--------------|--------------|--------------|--------------|--------------|-------------|--------------|------------|------------|--------------|--------------|--------------|
| 3EXJ_B        | CPHHE        | -55.7        | -38.6        | -68.5        | -53.5        | -69.5        | -26.0        | 70.0        | -72.1        | 2.3        | 2.1        | 102.0        | 110.5        | 173.3        |
| 3EXL_A        | CPHHE        | -53.7        | -32.6        | -70.0        | -53.8        | -68.6        | -23.6        | 69.2        | -76.0        | 2.3        | 2.2        | 97.0         | 110.0        | 161.6        |
| 3IGK_A        | CPHHE        | -64.5        | -33.9        | -63.4        | -52.8        | -73.9        | -19.2        | 79.5        | -73.7        | 2.3        | 2.1        | 104.8        | 108.9        | 177.7        |
| 3IGL_A        | CPHHE        | -61.3        | -36.4        | -59.7        | -59.2        | -66.6        | -25.9        | 75.4        | -69.2        | 2.3        | 2.0        | 104.4        | 109.8        | 177.4        |
| <b>3KMD_A</b> | <b>CPHHE</b> | <b>-60.8</b> | <b>-37.1</b> | <b>-66.0</b> | <b>-52.4</b> | <b>-70.2</b> | <b>-27.7</b> | <b>72.2</b> | <b>-77.3</b> | <b>2.4</b> | <b>2.0</b> | <b>103.1</b> | <b>110.6</b> | <b>174.6</b> |
| 3KMD_B        | CPHHE        | -61.9        | -38.0        | -65.9        | -56.0        | -63.9        | -34.5        | 70.8        | -72.9        | 2.4        | 2.1        | 104.3        | 110.9        | 179.4        |
| 3KMD_C        | CPHHE        | -60.1        | -34.3        | -67.2        | -53.8        | -68.8        | -30.7        | 75.2        | -72.9        | 2.4        | 2.0        | 102.6        | 109.1        | 175.1        |
| 3KMD_D        | CPHHE        | -59.3        | -34.6        | -67.6        | -51.2        | -72.2        | -30.8        | 76.1        | -78.2        | 2.3        | 2.2        | 99.9         | 107.8        | 172.4        |
| 3KZ8_A        | CPHHE        | -65.9        | -33.7        | -62.5        | -55.5        | -71.5        | -17.7        | 73.6        | -67.1        | 2.3        | 2.0        | 106.5        | 112.8        | 172.7        |
| 3KZ8_B        | CPHHE        | -65.7        | -33.9        | -63.2        | -55.3        | -71.7        | -17.9        | 74.6        | -67.9        | 2.3        | 2.0        | 106.5        | 111.9        | 172.8        |
| 3MHS_A        | CIVHT        | -61.1        | -37.4        | -64.4        | -46.7        | -83.3        | -10.5        | 79.5        | -72.1        | 2.3        | 2.1        | 108.8        | 107.7        | 173.8        |
| 3NY1_A        | CVNHE        | -65.2        | -38.5        | -60.5        | -42.5        | -99.3        | -3.0         | 69.8        | -56.9        | 2.3        | 2.1        | 97.7         | 111.6        | 172.9        |
| 3NY1_B        | CVNHE        | -56.7        | -31.3        | -75.4        | -28.1        | -108.8       | -0.2         | 72.3        | -60.4        | 2.3        | 2.1        | 103.9        | 111.4        | 168.3        |
| 3PLW_A        | CRWHH        | -61.3        | -32.7        | -80.6        | -20.9        | -95.7        | -10.4        | 70.0        | -90.5        | 2.4        | 2.1        | 105.3        | 106.4        | 174.2        |
| 3Q01_A        | CPHHE        | -60.5        | -44.5        | -51.1        | -50.1        | -75.4        | -30.6        | 69.4        | -82.8        | 2.4        | 2.2        | 100.5        | 108.9        | 171.2        |
| 3Q01_B        | CPHHE        | -59.0        | -44.8        | -49.3        | -53.7        | -71.6        | -34.4        | 70.1        | -81.8        | 2.4        | 2.2        | 104.3        | 109.0        | 164.3        |
| 3Q05_A        | CPHHE        | -54.3        | -39.8        | -58.7        | -58.0        | -70.0        | -20.6        | 71.2        | -78.4        | 2.4        | 2.4        | 102.4        | 113.5        | 171.6        |
| 3Q05_B        | CPHHE        | -58.7        | -39.5        | -63.1        | -57.2        | -70.8        | -14.9        | 83.4        | -77.6        | 2.7        | 2.4        | 103.1        | 99.1         | 174.6        |
| 3Q05_C        | CPHHE        | -54.8        | -37.4        | -66.2        | -52.9        | -73.1        | -26.9        | 65.3        | -75.2        | 2.3        | 2.2        | 109.9        | 120.8        | 176.0        |
| 3Q05_D        | CPHHE        | -54.2        | -40.0        | -58.4        | -57.6        | -70.3        | -22.1        | 70.9        | -78.4        | 2.4        | 2.3        | 104.4        | 116.0        | 171.8        |
| 3VRH_A        | CEEHF        | -52.0        | -50.7        | -71.6        | -38.3        | -74.3        | -25.4        | 74.4        | -81.5        | 2.5        | 2.2        | 95.6         | 102.4        | 162.2        |



|         |       |       |       |       |       |        |       |      |       |     |     |       |       |       |
|---------|-------|-------|-------|-------|-------|--------|-------|------|-------|-----|-----|-------|-------|-------|
| 4GNE_A2 | CKDHE | -59.4 | -28.8 | -77.9 | -26.9 | -118.4 | 5.1   | 72.1 | -60.8 | 2.3 | 2.1 | 98.7  | 111.9 | 168.8 |
| 4HJE_A  | CPHHE | -58.5 | -36.8 | -68.0 | -52.6 | -68.2  | -31.1 | 74.0 | -77.6 | 2.4 | 2.1 | 103.1 | 109.7 | 178.9 |
| 4HJE_B  | CPHHE | -57.9 | -36.9 | -68.2 | -51.3 | -70.0  | -30.7 | 74.1 | -77.0 | 2.3 | 2.1 | 102.9 | 107.1 | 179.4 |
| 4HJE_C  | CPHHE | -57.7 | -36.6 | -67.2 | -53.3 | -68.8  | -28.9 | 74.5 | -77.8 | 2.3 | 2.1 | 103.9 | 109.0 | 178.8 |
| 4HJE_D  | CPHHE | -57.8 | -38.9 | -65.9 | -53.1 | -68.6  | -29.0 | 73.1 | -77.4 | 2.3 | 2.1 | 103.3 | 109.6 | 179.6 |
| 4IBU_A  | CPHHE | -57.5 | -35.8 | -64.8 | -53.0 | -67.9  | -31.7 | 73.1 | -79.4 | 2.3 | 2.0 | 106.5 | 110.8 | 173.6 |
| 4IBU_B  | CPHHE | -58.3 | -33.5 | -68.4 | -54.1 | -67.9  | -30.8 | 74.8 | -77.9 | 2.4 | 2.1 | 105.3 | 107.4 | 175.7 |
| 4IBU_C  | CPHHE | -58.4 | -35.1 | -64.8 | -55.3 | -67.7  | -29.8 | 75.6 | -79.0 | 2.3 | 2.1 | 106.6 | 108.1 | 178.1 |
| 4IBU_D  | CPHHE | -54.0 | -37.5 | -66.3 | -52.1 | -67.8  | -33.8 | 73.0 | -81.2 | 2.3 | 2.0 | 106.4 | 111.3 | 177.2 |
| 4IBV_A  | CPHHE | -65.9 | -29.5 | -62.8 | -55.1 | -71.9  | -23.0 | 80.6 | -69.9 | 2.3 | 2.1 | 105.6 | 108.1 | 176.8 |
| 4IBW_A  | CPHHE | -61.0 | -35.3 | -61.8 | -52.8 | -73.0  | -29.3 | 76.4 | -73.6 | 2.3 | 2.1 | 103.4 | 109.8 | 177.0 |
| 4LJO_A  | CQAHY | -57.5 | -48.1 | -67.6 | -43.0 | -73.3  | -31.9 | 65.2 | -77.4 | 2.2 | 2.1 | 99.7  | 110.6 | 175.0 |
| 4NN2_A  | CKNHS | -59.5 | -26.7 | -79.5 | -18.0 | -121.0 | 23.9  | 80.0 | -68.3 | 2.3 | 2.1 | 103.8 | 107.6 | 175.7 |
| 4NN2_B  | CKNHS | -59.4 | -24.2 | -83.8 | -14.6 | -125.6 | 13.7  | 79.8 | -66.2 | 2.3 | 2.1 | 101.5 | 106.2 | 170.1 |
| 4QO1_B  | CPHHE | -53.8 | -44.7 | -55.0 | -51.9 | -75.5  | -34.5 | 78.1 | -82.7 | 2.4 | 2.0 | 104.3 | 107.4 | 174.6 |
| 4YBG_A  | CQYHE | -64.8 | -40.2 | -60.2 | -42.9 | -77.5  | -23.9 | 72.1 | -83.3 | 2.3 | 2.0 | 103.6 | 109.2 | 175.0 |
| 5AFO_A  | CERHE | -54.3 | -45.5 | -58.2 | -53.7 | -63.5  | -40.8 | 80.1 | -79.8 | 2.4 | 2.1 | 78.4  | 105.0 | 148.2 |
| 5AFO_C  | CERHE | -50.6 | -43.3 | -59.5 | -55.4 | -63.6  | -47.6 | 79.3 | -82.5 | 2.4 | 2.2 | 87.7  | 93.6  | 161.6 |
| 5AFO_D  | CERHE | -51.8 | -42.8 | -58.6 | -58.0 | -63.2  | -44.1 | 78.9 | -83.0 | 2.3 | 2.1 | 91.1  | 101.2 | 163.4 |
| 5FV3_A  | CLHHV | -76.1 | -3.3  | -85.8 | -16.3 | -130.6 | 48.6  | 74.3 | -62.1 | 2.3 | 2.3 | 99.7  | 110.6 | 170.4 |
| 5YKN_A  | CLIHA | -65.3 | -20.2 | -72.0 | -36.7 | -108.4 | 28.9  | 73.4 | -53.4 | 2.3 | 2.1 | 105.6 | 110.8 | 147.3 |

|                     |       |            |            |            |             |             |              |           |            |                |                |            |            |            |
|---------------------|-------|------------|------------|------------|-------------|-------------|--------------|-----------|------------|----------------|----------------|------------|------------|------------|
| 5ZTB_A <sup>†</sup> | CREHY | -59.9      | -56.0      | -67.3      | -33.8       | -80.4       | -28.7        | 65.1      | -71.9      | 2.2            | 2.2            | 120.1      | 112.2      | 114.2      |
| 6MM1_A              | CETHR | -63.7      | -34.6      | -64.3      | -41.8       | -79.3       | -27.6        | 73.7      | -85.5      | 2.3            | 2.0            | 106.6      | 111.3      | 169.9      |
| 6U04_A              | CDIHT | -72.2      | -15.2      | -71.0      | -30.6       | -116.1      | 13.4         | 77.9      | -68.4      | 2.4            | 2.0            | 102.4      | 113.1      | 174.9      |
| 6ZSL_B              | CKSHK | -66.3      | -36.7      | -71.8      | -33.9       | -109.2      | 24.1         | 71.7      | -50.0      | 2.5            | 2.0            | 81.9       | 105.8      | 159.1      |
| 7D2T_B              | CETHY | -56.9      | -46.7      | -63.2      | -39.9       | -82.4       | -27.0        | 71.9      | -74.8      | 2.3            | 2.1            | 97.5       | 106.6      | 159.9      |
| Average<br>STD      |       | -59<br>(5) | -37<br>(8) | -65<br>(7) | -47<br>(12) | -79<br>(18) | - 21<br>(19) | 72<br>(4) | -75<br>(8) | 2.34<br>(0.07) | 2.08<br>(0.09) | 102<br>(6) | 110<br>(4) | 171<br>(9) |

| Cluster 2           |              |              |              |              |              |               |             |              |              |            |            |              |              |              |
|---------------------|--------------|--------------|--------------|--------------|--------------|---------------|-------------|--------------|--------------|------------|------------|--------------|--------------|--------------|
| 2D5B_A              | CPIHG        | -62.3        | -9.6         | -105.6       | -52.6        | -93.7         | -8.4        | 173.7        | -59.0        | 2.3        | 2.1        | 111.5        | 114.2        | 156.7        |
| 3OHR_A              | CPYHG        | -65.1        | -26.2        | -84.7        | -44.0        | -118.2        | -12.7       | 178.5        | -48.4        | 2.3        | 2.0        | 106.7        | 103.6        | 175.1        |
| 3RAY_A              | CPNHG        | -67.5        | -6.0         | -121.6       | -21.3        | -122.6        | -5.7        | 175.6        | -66.2        | 2.3        | 2.4        | 118.9        | 129.5        | 174.0        |
| 4C1Q_A              | CPNHG        | -64.7        | -24.3        | -89.5        | -44.1        | -108.3        | -0.8        | -179.0       | -64.3        | 2.3        | 2.5        | 107.1        | 109.9        | 138.4        |
| 4C1Q_B              | CPNHG        | -62.1        | -28.5        | -87.7        | -44.9        | -108.2        | -1.2        | -179.4       | -64.7        | 2.3        | 2.3        | 112.4        | 107.4        | 139.3        |
| 4HCG_A              | CRYHL        | -64.1        | -23.8        | -84.8        | -25.2        | -132.2        | 15.2        | 170.9        | -60.0        | 2.3        | 2.0        | 110.1        | 99.4         | 175.1        |
| 4HCG_B              | CRYHL        | -63.6        | -27.1        | -81.6        | -26.0        | -129.1        | 15.8        | 169.0        | -60.6        | 2.2        | 2.0        | 110.7        | 101.2        | 175.6        |
| <b>4IJD_A</b>       | <b>CAAHG</b> | <b>-56.0</b> | <b>-30.1</b> | <b>-91.5</b> | <b>-33.9</b> | <b>-119.1</b> | <b>-4.7</b> | <b>173.9</b> | <b>-61.9</b> | <b>2.3</b> | <b>2.2</b> | <b>111.6</b> | <b>115.0</b> | <b>168.3</b> |
| 4IJD_B              | CAAHG        | -57.6        | -38.5        | -80.5        | -45.9        | -114.9        | -0.6        | -176.4       | -56.1        | 2.4        | 2.2        | 120.9        | 106.1        | 161.4        |
| 4IXJ_A <sup>†</sup> | CTKHP        | -61.0        | -17.2        | -106.8       | -3.7         | -138.1        | 89.4        | 171.7        | -74.2        | 2.3        | 2.3        | 123.9        | 108.7        | 178.3        |
| 4IXJ_B <sup>†</sup> | CTKHP        | -72.0        | -18.1        | -100.6       | -20.1        | -128.5        | 93.9        | 167.8        | -67.6        | 2.4        | 2.2        | 123.4        | 106.8        | 170.4        |
| 4RH4_A              | CTPHY        | -50.8        | -53.8        | -63.5        | -34.6        | -105.1        | 15.0        | 167.8        | -60.2        | 2.2        | 2.0        | 111.3        | 100.7        | 179.6        |
| 5EIU_A              | CARHG        | -60.4        | -29.4        | -96.6        | -42.0        | -107.3        | -13.6       | -177.1       | -55.7        | 2.3        | 2.0        | 106.5        | 102.9        | 174.7        |
| 5O6C_A              | CPKHG        | -55.0        | -35.3        | -84.2        | -43.4        | -114.4        | -2.3        | -177.1       | -58.4        | 2.3        | 2.1        | 110.1        | 114.2        | 177.4        |
| 5OLM_A              | CAVHG        | -70.7        | -35.6        | -88.0        | -28.3        | -111.9        | -15.1       | -178.1       | -61.2        | 2.3        | 2.2        | 108.1        | 101.0        | 174.3        |

|                           |              |              |              |              |              |               |             |               |              |            |            |              |              |              |
|---------------------------|--------------|--------------|--------------|--------------|--------------|---------------|-------------|---------------|--------------|------------|------------|--------------|--------------|--------------|
| 6LND_K                    | CHSHN        | -73.0        | -17.5        | -92.8        | -34.2        | -103.8        | -4.8        | 173.4         | -62.7        | 2.3        | 2.1        | 104.5        | 106.0        | 166.7        |
| Average                   |              | -63          | -26          | -91          | -34          | -116          | 10          | 177           | -61          | 2.31       | 2.16       | 112          | 108          | 168          |
| STD                       |              | (6)          | (11)         | (13)         | (12)         | (12)          | (32)        | (6)           | (6)          | (0.04)     | (0.13)     | (6)          | (7)          | (13)         |
| Cluster 3                 |              |              |              |              |              |               |             |               |              |            |            |              |              |              |
| 1WUR_A                    | CEHHL        | -66.4        | -18.2        | -79.5        | -34.9        | -127.2        | -5.5        | 71.1          | -56.4        | 2.3        | 2.2        | 113.2        | 105.0        | 159.0        |
| 1WUR_B                    | CEHHL        | -68.7        | -17.1        | -79.7        | -35.6        | -127.5        | -5.3        | 72.2          | -54.9        | 2.3        | 2.3        | 109.4        | 105.1        | 154.2        |
| 1WUR_C                    | CEHHL        | -63.0        | -21.4        | -77.6        | -37.1        | -124.2        | -7.7        | 71.9          | -61.4        | 2.3        | 2.4        | 110.3        | 104.2        | 159.6        |
| 1WUR_D                    | CEHHL        | -64.5        | -18.7        | -78.0        | -40.5        | -122.1        | -6.3        | 71.4          | -57.0        | 2.4        | 2.2        | 111.3        | 104.8        | 162.5        |
| 1WUR_E                    | CEHHL        | -67.2        | -18.3        | -78.5        | -40.3        | -122.4        | -6.8        | 65.7          | -56.8        | 2.5        | 2.2        | 110.8        | 100.3        | 161.7        |
| <b>3MHJ_A</b>             | <b>CPVHK</b> | <b>-62.5</b> | <b>-40.3</b> | <b>-74.6</b> | <b>-42.5</b> | <b>-113.4</b> | <b>-5.6</b> | <b>66.8</b>   | <b>-48.1</b> | <b>2.3</b> | <b>2.1</b> | <b>107.7</b> | <b>102.6</b> | <b>169.1</b> |
| 3MHJ_B                    | CPVHK        | -66.1        | -29.1        | -82.0        | -45.7        | -112.4        | -3.6        | 66.7          | -50.6        | 2.3        | 2.2        | 110.2        | 104.8        | 172.2        |
| 4TOR_A                    | CPTHK        | -62.4        | -40.5        | -78.8        | -43.3        | -108.0        | -8.1        | 62.7          | -50.4        | 2.3        | 2.1        | 107.9        | 103.3        | 165.8        |
| 4TOR_B                    | CPTHK        | -58.4        | -41.1        | -79.9        | -43.4        | -108.0        | -7.3        | 64.0          | -46.5        | 2.3        | 2.0        | 108.4        | 101.9        | 173.3        |
| 4TOR_C                    | CPTHK        | -58.1        | -40.6        | -81.5        | -43.7        | -108.3        | -6.9        | 65.7          | -50.6        | 2.3        | 2.1        | 108.1        | 103.1        | 169.9        |
| 4TOR_D                    | CPTHK        | -60.5        | -40.8        | -81.3        | -42.1        | -107.7        | -9.3        | 64.3          | -49.7        | 2.3        | 2.1        | 108.5        | 101.6        | 170.2        |
| 5C5R_A                    | CPVHK        | -59.8        | -41.4        | -71.3        | -43.3        | -116.2        | -3.5        | 63.8          | -52.8        | 2.3        | 2.2        | 109.7        | 100.6        | 168.0        |
| 5C5R_B                    | CPVHK        | -64.2        | -28.6        | -82.5        | -41.4        | -116.3        | -6.6        | 64.2          | -53.6        | 2.4        | 2.2        | 110.3        | 102.1        | 164.8        |
| Average                   |              | -63          | -31          | -79          | -41          | -116          | -6          | 67            | -53          | 2.33       | 2.16       | 110          | 103          | 165          |
| STD                       |              | (3)          | (10)         | (3)          | (3)          | (7)           | (2)         | (3)           | (4)          | (0.05)     | (0.10)     | (2)          | (2)          | (6)          |
| Cluster 4                 |              |              |              |              |              |               |             |               |              |            |            |              |              |              |
| 2V0C_A <sup>†</sup>       | CWRHE        | -50.6        | -29.3        | -94.4        | -34.3        | -113.6        | 81.2        | 174.3         | -59.5        | 2.3        | 2.2        | 112.6        | 104.2        | 168.8        |
| 2YVR_A <sup>†</sup>       | CNVHK        | -81.0        | -15.4        | -96.8        | -49.0        | -105.1        | 83.4        | -179.8        | -51.7        | 2.4        | 2.1        | 109.5        | 106.0        | 168.6        |
| 2YVR_B <sup>†</sup>       | CNVHK        | -66.9        | -27.0        | -96.7        | -50.6        | -101.1        | 87.7        | -178.2        | -52.1        | 2.4        | 2.0        | 111.7        | 104.7        | 168.9        |
| <b>3DDT_A<sup>†</sup></b> | <b>CKEHE</b> | <b>-64.6</b> | <b>-35.9</b> | <b>-80.8</b> | <b>-39.7</b> | <b>-117.2</b> | <b>86.7</b> | <b>-177.1</b> | <b>-55.2</b> | <b>2.4</b> | <b>2.2</b> | <b>110.3</b> | <b>105.9</b> | <b>161.1</b> |

|                     |       |        |       |        |       |        |       |        |       |        |        |       |       |       |
|---------------------|-------|--------|-------|--------|-------|--------|-------|--------|-------|--------|--------|-------|-------|-------|
| 3DDT_B <sup>†</sup> | CKEHE | -64.1  | -44.8 | -71.8  | -41.9 | -114.6 | 93.5  | -178.1 | -52.8 | 2.4    | 2.0    | 111.8 | 100.5 | 170.0 |
| 3DDT_C <sup>†</sup> | CKEHE | -66.1  | -38.2 | -84.3  | -24.6 | -128.4 | 78.2  | -174.2 | -60.4 | 2.3    | 2.2    | 115.9 | 105.4 | 168.2 |
| 3Q1D_A <sup>†</sup> | CEEHE | -64.4  | -39.4 | -84.5  | -49.0 | -98.7  | 81.1  | 179.5  | -53.7 | 2.3    | 2.2    | 110.3 | 105.4 | 169.9 |
| 3RYM_A <sup>†</sup> | CTPHP | -54.5  | -51.6 | -75.0  | -18.4 | -130.3 | 67.5  | -175.7 | -43.8 | 2.3    | 2.1    | 110.3 | 102.8 | 175.8 |
| 3RYM_B <sup>†</sup> | CTPHP | -54.3  | -52.6 | -74.4  | -14.8 | -135.7 | 66.6  | -174.6 | -45.8 | 2.2    | 2.1    | 111.8 | 102.0 | 173.1 |
| 3RYM_C <sup>†</sup> | CTPHP | -54.5  | -51.2 | -75.6  | -19.0 | -129.1 | 67.9  | -174.3 | -42.3 | 2.3    | 2.1    | 116.3 | 102.0 | 170.6 |
| 3RYM_D <sup>†</sup> | CTPHP | -56.5  | -50.4 | -75.6  | -18.9 | -129.9 | 66.7  | -175.7 | -44.1 | 2.3    | 2.1    | 113.2 | 102.4 | 174.9 |
| Average             |       | -62    | -40   | -83    | -33   | -119   | 78    | -178   | -51   | 2.32   | 2.12   | 112   | 104   | 170   |
| STD                 |       | (8)    | (11)  | (9)    | (13)  | (12)   | (9)   | (3)    | (6)   | (0.04) | (0.08) | (2)   | (2)   | (4)   |
| Outlier 5           |       |        |       |        |       |        |       |        |       |        |        |       |       |       |
| 2AU3_A <sup>†</sup> | CPFHP | -85.8  | -3.1  | -109.5 | -24.1 | -134.9 | 158.0 | -175.1 | 93.2  | 2.3    | 2.0    | 104.4 | 97.1  | 155.1 |
| Outlier 6           |       |        |       |        |       |        |       |        |       |        |        |       |       |       |
| 5AF0_B              | CERHE | -58.3  | -47.8 | -58.7  | -53.8 | -63.2  | -44.6 | -176.7 | -81.5 | 2.7    | 2.0    | 95.3  | 99.1  | 137.3 |
| Outlier 7           |       |        |       |        |       |        |       |        |       |        |        |       |       |       |
| 6VHF_A <sup>†</sup> | CKPHN | -121.3 | -36.6 | -57.2  | -30.5 | -114.7 | 18.1  | 178.4  | -49.6 | 2.4    | 2.2    | 117.5 | 101.8 | 149.5 |

<sup>a</sup> The identifier of the chain containing the C-X<sub>1</sub>-X<sub>2</sub>-H-X<sub>3</sub> motif is specified.

<sup>†</sup> These structures do not show the expected *i*, *i*+4 hydrogen bond (mostly Pro residue in X<sub>3</sub> position).

**Table S5.** Torsion angles of Zn(II)-METP3 complex as obtained from REM (first row Chain A, second row Chain B) calculations *in vacuo* at 300 K.

| <b>Residue</b> | $\phi$ (°) | $\psi$ (°) | $\chi^1$ (°) |
|----------------|------------|------------|--------------|
| <b>Cys1</b>    | -119       | 139        | -178         |
|                | -133       | 156        | -174         |
| <b>Thr2</b>    | -74        | -21        | 57           |
|                | -96        | -3         | 54           |
| <b>Gly3</b>    | -86        | -8         |              |
|                | -112       | -18        |              |
| <b>His4</b>    | -157       | 6          | 88           |
|                | -140       | 8          | 89           |
| <b>Ser5</b>    | 75         | -75        | -166         |
|                | 76         | -68        | -165         |
| <b>Gly6</b>    | 81         | 179        |              |
|                | 78         | 172        |              |
| <b>Asn7</b>    | -118       | -165       | 65           |
|                | -116       | -167       | 68           |
| <b>Aib8</b>    | -41        | -44        |              |
|                | -50        | -35        |              |
| <b>Ser9</b>    | -67        | -42        | 73           |
|                | -64        | -44        | 80           |
| <b>Glu10</b>   | -66        | -40        | -61          |
|                | -65        | -40        | -60          |
| <b>Ile11</b>   | -72        | -57        | -57          |
|                | -69        | -57        | -54          |

**Table S6.** Intramolecular hydrogen bonds of Zn(II)-METP3 complex as obtained from REM calculations *in vacuo* at 300K.

| <b>Donor<br/>(D)</b> | <b>Acceptor<br/>(A)</b> | <b>d (D...A) (Å)<br/>chain A</b> | <b>d (D...A) (Å)<br/>chain B</b> |
|----------------------|-------------------------|----------------------------------|----------------------------------|
| Cys <sup>1</sup> HN  | Glu <sup>10</sup> C'O   | 2.99                             | 2.99                             |
| Ser <sup>5</sup> HN  | Cys <sup>1</sup> C'O    | 2.73                             | 2.72                             |
| Ile <sup>11</sup> HN | Gly <sup>7</sup> C'O    | 3.20                             | 3.20                             |
| Asn <sup>7</sup> HN  | Glu <sup>10</sup> Oε1   | 2.87                             | 2.87                             |
| His <sup>4</sup> Nε2 | Glu <sup>10</sup> Oε2   | 2.83                             | 2.83                             |
| Ser <sup>9</sup> HN  | Asn <sup>7</sup> Oδ1    | 3.10                             | 3.10                             |
| Asn <sup>7</sup> Nδ  | Glu <sup>10</sup> Oε1   | 3.02                             | 3.03                             |
| Asn <sup>7</sup> Nδ  | Ser <sup>9</sup> Oγ     | 3.30                             | 3.30                             |
